# Multimodal BEHRT: Transformers for Multimodal Electronic Health Records to predict breast cancer prognosis

Ndèye Maguette Mbaye<sup>1,2,3</sup>, Michael Danziger<sup>4</sup>, Aullène Toussaint<sup>2,6</sup>, Elise Dumas<sup>1,3,6</sup>, Julien Guerin<sup>9</sup>, Anne-Sophie Hamy-Petit<sup>2,6</sup>, Fabien Reyat<sup>6,7,8</sup>, Michal Rosen-Zvi<sup>4,5</sup> and Chloé-Agathe Azencott<sup>1,2,3\*</sup>

<sup>1</sup>CBIO-Centre for Computational Biology, Mines Paris, PSL Research University, Paris, France

<sup>2</sup>Institut Curie, PSL Research University, Paris, France

<sup>3</sup>U900, Inserm, Paris, France

<sup>4</sup>AI for Accelerated Healthcare and Life Sciences Discovery, IBM Research Lab - Israel, Haifa 3498825, Israel

<sup>5</sup>The Hebrew University of Jerusalem, Ein Kerem Campus, Jerusalem, Israel

<sup>6</sup>Residual Tumor & Response to Treatment Laboratory, RT2Lab, Translational Research Department, INSERM, U932 Immunity and Cancer, Paris, France

<sup>7</sup>Department of Surgical Oncology, Institut Curie, University of Paris, Paris, France

<sup>8</sup>Department of Surgery, Institut Jean Godinot, Reims, France

<sup>9</sup>Data Office, Institut Curie, 26, rue Ulm 75248 PARIS, France.

Correspondence\*:

Corresponding Author

chloe-agathe.azencott@minesparis.psl.eu

## 2 ABSTRACT

3 **Background** Breast cancer is a complex disease that affects millions of people and is the leading  
4 cause of cancer death worldwide. There is therefore still a need to develop new tools to improve  
5 treatment outcomes for breast cancer patients. Electronic Health Records (EHRs) contain a  
6 wealth of information about patients, from pathological reports to biological measurements,  
7 that could be useful towards this end but remain mostly unexploited. Recent methodological  
8 developments in deep learning, however, open the way to developing new methods to leverage  
9 this information to improve patient care.

10 **Methods** In this study, we propose M-BEHRT, a Multimodal BERT for Electronic Health Record  
11 (EHR) data based on BEHRT, itself an architecture based on the popular natural language  
12 architecture BERT (Bidirectional Encoder Representations from Transformers). M-BEHRT models  
13 multimodal patient trajectories as a sequence of medical visits, which comprise a variety of  
14 information ranging from clinical features, results from biological lab tests, medical department  
15 and procedure, and the content of free-text medical reports. M-BEHRT uses a pretraining task  
16 analog to a masked language model to learn a representation of patient trajectories from data  
17 that includes data that is unlabeled due to censoring, and is then fine-tuned to the classification  
18 task at hand. Finally, we used a gradient-based attribution method -to highlight which parts of the  
19 input patient trajectory were most relevant for the prediction.

NOTE: This preprint reports new research that has not been certified by peer review and should not be used to guide clinical practice.

20 **Results** We apply M-BEHRT to a retrospective cohort of about 15 000 breast cancer patients  
21 from Institut Curie (Paris, France) treated with adjuvant chemotherapy, using patient trajectories  
22 for up to one year after surgery to predict disease-free survival (DFS). M-BEHRT achieves an  
23 AUC-ROC of 0.77 [0.70-0.84] on a held-out data set for the prediction of DFS 3 years after surgery,  
24 compared to 0.67 [0.58-0.75] for the Nottingham Prognostic Index (NPI) and for a random forest  
25 ( $p$ -values = 0.031 and 0.050 respectively).

26 In addition, we identified subsets of patients for which M-BEHRT performs particularly well such  
27 as older patients with at least one lymph node affected.

28 **Conclusion** In conclusion, we proposed a novel deep learning algorithm to learn from multimodal  
29 EHR data. Learning from about 15 000 patient records, our model achieves state-of-the-art  
30 performance on two classification tasks. The EHR data used to perform these tasks was more  
31 homogeneous compared to other datasets used for pretraining, as it exclusively comprised  
32 adjuvant treated breast cancer patients. This highlights both the potential of EHR data for  
33 improving our understanding of breast cancer and the ability of transformer-based architectures  
34 to learn from EHR data containing much fewer than the millions of records typically used in  
35 currently published studies. The representation of patient trajectories used by M-BEHRT captures  
36 their sequential aspect, and opens new research avenues for understanding complex diseases  
37 and improving patient care.

38 **Keywords:** electronic health records, breast cancer, relapse prediction, transformers, keyword, keyword, keyword, keyword

## 1 INTRODUCTION

39 Breast cancer is by far the most commonly diagnosed cancer among women (almost 2.3 million cases  
40 worldwide in 2022) and the leading cause of cancer death worldwide (1).

41 Among the various treatment options, adjuvant chemotherapy is proposed to patients after first-line  
42 surgery to lower the chance that the cancer will return. It is a widely used treatment option, and is offered  
43 in many cases, unless the tumor was small, did not show sign of aggressiveness, and no lymph nodes were  
44 affected. However, recurrence or death are still possible. Accurately identifying the patients most likely  
45 to relapse is therefore important to inform both treatment selection and future research to propose better  
46 therapeutic options.

47 One of the most commonly used prognostic tools for breast cancer is the Nottingham Prognosis Index  
48 (NPI), which uses a combination of three clinical features (tumor size, tumor grade, and number of lymph  
49 nodes) and was proposed in 1982 (2). Since then, many authors have used statistical and machine learning  
50 algorithms to build breast cancer relapse predictors from clinical features; however NPI still seems to be  
51 the most robust criterion (3), despite its limitations.

52 In the quest for improving the future outcome of patients, there has been a growing interest over the  
53 years for including information besides clinical features into prognostic tools. These modalities include  
54 biological measurements (4), magnetic resonance imaging (5), ultrasound images (6), histopathological  
55 images or gene expression data (7). The papers cited show that combining different modalities improves  
56 prediction performance.

57 However, these modalities are not always available for all patients treated. For this reason, other authors  
58 have taken advantage of the considerable information present in medical reports that constitute the EHR of  
59 patients, using named entity recognition techniques to extract relevant terms from clinical notes (8, 9).

60 Among those, transformer-based models inspired by BERT (Bidirectional Encoder Representations  
61 from Transformer) (10), an architecture that has significantly outperformed previous methods on a large  
62 variety of natural language processing tasks and continues to drive advancements in the field, have recently  
63 gathered a lot of interest. Their superiority is explained by the use of self-supervised pretraining tasks,  
64 such as masked language modeling and next sentence prediction, which allows them to learn better  
65 representations of the data. These architectures have been successfully transposed to patient trajectories by  
66 seeing them as sequences of medical events rather than of words (11, 12, 13, 14, 15). To the best of our  
67 knowledge, however, none of these have considered cancer-related clinical outcomes, possibly because  
68 they are typically applied to very large cohorts of millions of patients.

69 In this paper, we present several new transformer architectures for predicting clinical outcomes from  
70 multimodal EHR data, which consider patient trajectories as sequences of medical visits represented by  
71 both tabular data (clinical features, biological measurements, therapies, nature of the visit) and free-text  
72 medical reports. We evaluate our proposed method on the prediction of disease-free survival in breast  
73 cancer, on a cohort of several thousands of patients. We pretrain the models on the equivalent of a masked  
74 language model, which can also be trained on records excluded from the classification training set because  
75 they were censored.

## 2 MATERIALS AND METHODS

### 76 2.1 Data

77 In this work, we used data extracted from the EHR system from Institut Curie in Paris (France). All data  
78 collected were pseudonymized. Additionally, individuals under 18 years of age, with a history of previous  
79 cancer, under guardianship, or unable to provide consent were excluded from this study. Every patient  
80 included in the study has completed and signed a research informed consent form. The study was approved  
81 by the Breast Cancer Study Group of Institut Curie and was conducted according to institutional and ethical  
82 rules concerning research on tissue specimens and patients.

83 We built a data base of 15 150 unique patients, treated with adjuvant chemotherapy for breast cancer  
84 between 2005 and 2012. The data base contains general descriptors of patients (such as age, sex, or weight)  
85 as well as information about each visit in their medical record: clinical information such as tumor size or  
86 cancer subtype, biological markers (tumor markers, counts of leukocytes and their subtypes) if they were  
87 measured, treatment information, and free-text notes. Finally, the patients are annotated with survival and  
88 recurrence information.

89 Free-text notes are unstructured narrative descriptions or notes entered by healthcare professionals. Unlike  
90 the structured data, which is organized into predefined fields, free text allows healthcare providers to input  
91 progress reports and relevant patient information recorded during patient journey, in a more natural manner.  
92 Free text reports from cytopathology or radiology also capture key information from medical images, as  
93 captured by experts. Those medical reports comprise free-text clinical notes for consultations, as well as  
94 free-text reports of cytopathology, radiology, surgery, and blood tests. All reports are written in French.

### 95 2.2 Preprocessing

#### 96 2.2.1 Tabular data preprocessing

97 We first describe how we processed the structured or tabular, a.k.a structured, data describing each  
98 medical event for each patient.

### 99 **2.2.1.1 Biological measurements**

100 From biological measurements, we only kept features that have less than 30% of missing values: MONO,  
101 LEUK, LYMP, PN and CA 15-3. All numerical values have to be discretized to enable tokenization. We  
102 binarized biological measurements into two values: 1 if the value is outside the normal range for the  
103 biological measurement, and 2 otherwise. Figure S1 in the Supplementary Material shows the distribution  
104 of biological measurements; the medical normal range of these biological features can be found in Table S1  
105 in the Supplementary Material.

106 In addition, we also computed the differences  $\Delta_t = v_t - v_{t-1}$  between the current visit's biological  
107 value  $v_t$  and the previous visit's value  $v_{t-1}$ . We then discretized the  $\Delta$  values by dividing them by ten  
108 and rounding. This captures more subtle variations in biological measurements evolution than the mere  
109 abnormal/normal values.

### 110 **2.2.1.2 Clinical information**

111 From the clinical information, we included both longitudinal and non-longitudinal features: age,  
112 undergone therapies, and tumor size on the one hand, tumor grade and number of nodes involved at  
113 diagnostic as well as breast cancer molecular subtypes (Luminal, TNBC, HER2+/RH-, HER2+/RH+) on  
114 the other. Age is computed at each visit and discretized by rounding to the nearest integer. Descriptive  
115 statistics of the age, breast cancer subtype, grades, number of lymph nodes involved, tumor size and  
116 biological measurements are given in Table S1 in the Supplementary Material.

117 We combined tumor size, tumor grade and the number of lymph nodes involved into the NPI (2),  
118 a commonly used, clinically relevant and robust prognostic tool (3). The NPI is computed as  $NPI =$   
119  $0.2 \times \text{tumor\_size (cm)} + \text{tumor\_grade} + \text{lymph\_nodes\_stage}$ , where the lymph nodes stage is computed as  
120 1 (0 nodes), 2 (1 to 3 nodes) or 3 (> 3 nodes). The lower the score, the higher the chance of survival 5 years  
121 after surgery. The tumor size is measured at various points in the cancer journey. We kept for this study the  
122 clinical tumor size assessed at diagnosis when the tumor is palpable, and the pathological tumor size which  
123 is the histological size of the tumor extracted at the surgery. The NPI is recalculated with each new tumor  
124 size measurement, hence termed as the dynamic NPI (dNPI). For patients with at least one available feature  
125 among the three required for calculating the dNPI, we imputed missing tumor sizes using the mode value  
126 among samples of the same clinical or pathological tumor stage (TNM) status. The number of involved  
127 lymph nodes is the sum of the number of affected sentinel nodes and axillary nodes. We imputed missing  
128 number of nodes to zero and missing tumor grade to G2 (grade 2), based on the most frequent values in our  
129 data. The higher the dNPI, the lower the chance of survival.

130 Following Blamey et al. (16), we categorized dNPI into six prognostic groups (PG): Excellent (EPG)  
131 ( $NPI \leq 2.4$ ), Good (GPG) ( $2.4 < NPI \leq 3.4$ ); Moderate I (MPG I) ( $3.4 < NPI \leq 4.4$ ), Moderate II (MPG  
132 II) ( $4.4 < NPI \leq 5.4$ ), Poor (PPG) ( $5.4 < NPI \leq 6.4$ ) and Very Poor (VPPG) ( $NPI > 6.4$ ).

133 Because M-BEHRT can handle missing values (see Section 2.3.1), we did not impute missing values for  
134 longitudinal features. However, for the baselines, we opted to impute the tumor size, number of nodes,  
135 grades and cancer subtype by an aberrant value of 999. Using an aberrant value allows the model to  
136 explicitly identify and differentiate imputed values from the actual data, by analogy with not locating a  
137 token within a sentence when using M-BEHRT.

### 138 **2.2.1.3 Therapies, department and procedure**

139 Therapies are inferred by considering the occurrence date for the surgery, the start and end dates for  
140 hormone-therapy, chemotherapy and anti-HER2 treatment, and the number of doses administered for the  
141 radiotherapy. This inference incorporates the therapeutic protocol of Institut Curie (see Figure S2 in the  
142 Supplementary Material). Subtherapies, also inferred from this protocol, provide additional information  
143 about the specific molecules given in the case of chemotherapy or anti-HER2 therapy, radiation types in  
144 the case of radiotherapy, and specific surgical procedures including both breast and axillary surgeries. A  
145 list of all possible values for the therapies and subtherapies fields is given in Table S3 in the Supplementary  
146 Material.

147 Finally, medical visit department and procedure names are available within the headers of free-text  
148 reports. We normalized department and procedure names by removing accents, punctuation and special  
149 characters. We merged synonyms into a single word: for example, *anapath*, *anatomopathologie* and  
150 *anatomy-cyto-pathologie* are merged into *anatomy-cyto-pathologie* (anatomical cytology in English). To  
151 do so, we sifted through the corpus vocabulary, identifying and unifying synonyms and/or differently  
152 written terms to enhance coherence of the medical history. We also removed words that appear fewer than  
153 100 times in the whole corpus.

### 154 **2.2.1.4 Disease-Free Survival at 3 years**

155 Finally, we defined a binary classification task by labeling each patient with whether they had survived  
156 disease-free 3 years after the surgery.

157 We retained patient history up to one year after first surgery and starting from 6 months before the breast  
158 cancer diagnosis. This choice of one year after the first surgery as an index date ensures that we use as  
159 much of the patient's history as possible, without capturing an actual relapse. We removed patients who  
160 relapsed before the index date, as well as patients censored before 3 years after the first surgery, as depicted  
161 in Figure 1. All patients had at least 3 visits in their medical history. This results in 8 089 patients, with  
162 6.2% having a negative disease-free survival (DFS) status.

163 For the evaluation of our models, we held out a test set containing 520 patients, with a proportion of  
164 negative samples (6.1%) similar to that of the whole data set. For pre-training tasks requiring no labels (see  
165 Section 2.3.2), we used all patients and their full history.

## 166 **2.2.2 Free-text reports preprocessing**

167 Free-text reports represent unstructured textual descriptions of medical information recorded by medical  
168 experts. They can be clinical notes, that is to say, information recorded during patient encounters with  
169 clinicians, or reports made by specialists (laboratory biologists, radiologists, histopathologists) to interpret  
170 the results of medical exams. The average number of visits, reports, and words per report in our data are  
171 given in Table S1 in the Supplementary Material.

172 Unlike tabular data, that is recorded in a standardized way at least within a hospital, medical reports are  
173 highly variable, as they allow each healthcare provider to be distinctive in format, style, or terminology.  
174 Moreover, the semantic related to the medical field is complex, using abbreviations, acronyms, and  
175 medical jargon (17). Therefore, in addition to common NLP preprocessing steps (normalization, removal  
176 of noisy entities, adverbs, stopwords and text delimiters), our text preprocessing pipeline includes steps  
177 that are specific to medical reports. The full text preprocessing pipeline is described on Figure S3 in the

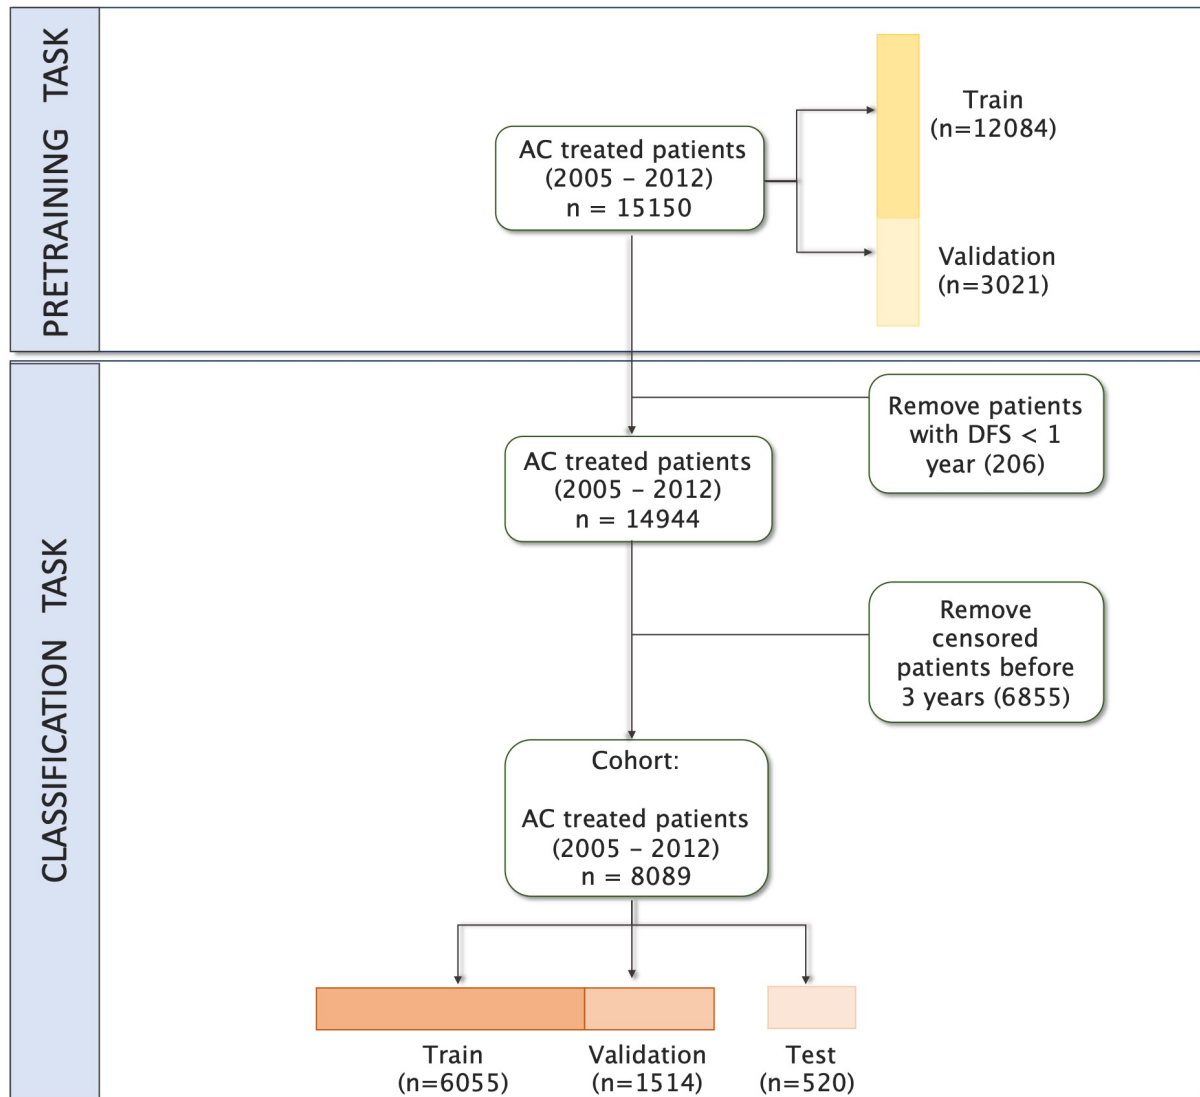

**Figure 1.** Flowchart of study inclusion and exclusion.

178 Supplementary Material, and we describe in Text S1 in the Supplementary Material the steps that are  
179 specific to clinical text.

### 180 **2.3 Multimodal BEHRT**

181 Information retrieved from EHR are generally time stamped events. In this study, this information is  
182 organized as structured or tabular data (for numerical values) collected over time, along with a series  
183 of free-text medical reports throughout the patient's journey. As in Natural Language Processing, EHR  
184 can be transformed into sequences of tokens, where each token represents a unit of information from  
185 the EHR rather than a linguistic unit. These sequences can then be fed into language models such as  
186 transformers (18). This was first proposed by Li et al. (11), who introduced BEHRT (BERT for EHR), an  
187 architecture based on that of BERT (Bidirectional Encoder Representations from Transformers) (10) to  
188 predict future conditions from a sequence of diagnoses.

189 Here we propose Multimodal-BEHRT (M-BEHRT), which combines two transformer-based deep learning  
190 models of architecture inspired by BEHRT's: Tabular BEHRT and Text BEHRT. Tabular BEHRT considers

191 that each medical visit is described using structured data: the department in which it took place, the  
192 corresponding procedure, as well as clinical and biological measurements available at this time. Like BERT  
193 and BEHRT, Tabular BEHRT combines a pre-training task (Masked Language Model) with a downstream  
194 task (the classification task), but applies it to a multimodal EHR tabular dataset. Text-BEHRT considers  
195 that each medical visit is represented by a free-text medical report. Text BERT uses adapted pretrained  
196 embeddings to build a sequence that serve as input for the classification task. M-BEHRT is a meta-model  
197 that combines Tabular BEHRT and Text BEHRT through a cross-attention module (19).

198 In what follows, we first describe how we construct patient trajectories (Section 2.3.1 from multimodal  
199 tabular data (Section 2.3.1.1) as well as free-text reports (Section 2.3.1.2). We then describe in Section 2.3.2  
200 the self-supervised approach used for learning embeddings of multimodal patient trajectories, and in  
201 Section 2.3.3 the architecture we propose for the binary classification of patient trajectories. Finally, we  
202 describe the baselines used to evaluate our models in Section 2.4.

## 203 2.3.1 Multimodal sequence construction

### 204 **2.3.1.1 Patient trajectory representation from structured data**

205 By analogy with Natural Language Processing data, a patient's history can be seen as a document, where  
206 visits serve as sentences, and the events within the visits act as tokens. In our final data, the medical  
207 sequence consists of a sequence of visits that are chronologically ordered.

208 We used dates from the medical reports to construct medical chronological sequences. Each visit is  
209 described by the specific department and procedure from which the report originates, which contextualizes  
210 additional features, which are incorporated as available.

211 As illustrated on Panel A of Figure 2, each visit is therefore described by at most 17 features: biological  
212 measurements that include binary values and deltas of measurements of the 5 biological markers, the  
213 medical department where the visit took place, the type of procedure the visit corresponded to, the therapy  
214 and sub-therapy administered, the patient's age, the dNPI and the breast cancer subtype (which is static but  
215 repeated at each visit).

216 A separate modality layer indicates what kind of feature each measurement corresponds to. Generally  
217 speaking, this could be set to simply indicating the modality (biological, clinical, visit), but here we chose  
218 to be specific and encode the feature name. This allows us in particular to deal with missing values, which  
219 can simply be skipped as the modality layers provides the information of what feature is at each position.  
220 The modality layer allows the algorithm to treat each modality differently.

221 As in BERT and BEHRT, a sequence of visits starts with the special token CLS, and visits are separated  
222 with the special token SEP.

223 Whereas BEHRT captures temporal information by including the age of the patient in a separate layer,  
224 we kept age as other clinical descriptors in the main input layer, but added another special embedding layer  
225 that represents the delay between the next visit and the previous. We discretized delays, as in Pang et al.  
226 (12), into W0-3 (under 1, 2, 3, or 4 weeks) for delays shorter than 4 weeks, M1-12 (under 1 month up to  
227 under 12 months) for delays shorter than a year and LT (long term) for delays longer than a year.

228 One of the notable constraints in BERT-like models is token capacity: they process tokens in fixed-size  
229 sequences of at most 512 tokens. While this size is arbitrary and varies depending on the exact BERT  
230 architecture and implementation, it cannot take much larger values, as it is linked to the memory usage of  
231 the self-attention mechanism of BERT, which grows quadratically with the number of tokens (each token

232 being attentive to every other token). There is therefore a tradeoff between the number of features/tokens  
233 used to describe each visit, and the number of visits that can be considered. This is alleviated by the  
234 exclusion of both missing values and biological delta values equal to zero (corresponding to an absence of  
235 change in measurement), which is possible as the modality layer informs the architecture as to the kind of  
236 feature each token corresponds to. In practice, if the patient trajectory still exceeds 512 tokens, we only  
237 consider the first 512 tokens, which represent the initial interactions of the patient with the healthcare  
238 system, and inform about initial diagnostic visits and treatment decisions. Figure S4 in the Supplementary  
239 Materials shows how much information is excluded from patient trajectories due to restricting data to the  
240 512 first tokens.

241 Panel A of Figure 2 illustrates this representation of patient trajectories based on tabular data.

### 242 **2.3.1.2 Patient trajectory representation from free text**

243 In addition, we assume that important information is contained within the text itself of the free-text  
244 reports. We therefore build a sequence of free-text reports, ordered chronologically from the date of the  
245 diagnosis until the index date (one year after the first surgery). As shown in Table S2 in the Supplementary  
246 Material, the number of reports per patient and the length of each report are such that these create very  
247 long documents (on average 34 reports, averaging 159 words each, for a total of more than 5 000 words  
248 per patient history). However, while BERT has proven to be highly effective in capturing contextual  
249 relationships and semantic nuances in text, it can only process sequences of at most 512 tokens, due to the  
250 memory footprint of the self-attention mechanism.

251 This constraint again poses challenges when dealing with lengthy documents such as a sequence of  
252 medical reports (20). Using transformers to classify long documents is still a topic of open research (21).  
253 The most straightforward approach consists in truncating inputs to fit within the allowed number of tokens,  
254 typically by using the first, last or middle tokens. However, limiting patient history to 512 tokens may  
255 result in major information loss and hence produce incomplete representation of medical reports. Other  
256 approaches such as Big Bird (22) or Nyströmformer (23) use sparse or low-rank approximations of the  
257 self-attention matrices. However, existing pretrained models typically do not handle more than 4 096  
258 tokens, which is still too short for some of the patients in our data set. In addition, they have only been  
259 trained on English corpora whereas our medical notes are in French. Nevertheless, our corpus is much too  
260 small to train a transformer model from scratch. Finally, many approaches consist in dividing long text into  
261 chunks smaller than 512 tokens and combining their embeddings, whether through an additional layer of  
262 self-attention in a hierarchical model (24) or by pooling (25). In the absence of a clear consensus on which  
263 of these strategies is likely to perform best (21, 25), we chose here to use a simple aggregation strategy.  
264 More specifically, we construct the embedding of every report by summing the embeddings of all tokens it  
265 contains, and construct sequences not of token embeddings, but of reports embeddings.

266 We obtain token embeddings from DrBERT (26), a state-of-the-art transformer model, based on the  
267 RoBERTa architecture (27) and trained on a French biomedical corpus which contains 7GB of clinical  
268 data from multiple sources. We can then train a BERT model on the sequences of reports embeddings.  
269 To account for temporality, we add an embedding layer of delays between reports. Finally, we use BERT  
270 special tokens: CLS for the start of a medical history and SEP to separate reports from different visits. This  
271 representation is illustrated on Panel B of Figure 2.



## 272 2.3.2 Pretraining task

273 To improve the embeddings of patient trajectories built from structured data, we follow the example  
274 of BEHRT and pre-train a Masked Language Model (MLM) on the representations described in  
275 Section 2.3.1.1.

276 As in Natural Language Processing, the MLM is designed to predict missing or masked tokens within a  
277 patient's history, using the bidirectionally context provided by the surrounding tokens. Its goal is to learn  
278 contextual representation of the medical events in the patient's history. For this purpose, in this pre-training  
279 phase Tabular-BEHRT uses the whole cohort of 15 150 patients and the entire sequence of events for each  
280 patient, from the date of diagnosis to the date of death or censorship, with a length average of  $506(\pm 466)$   
281 tokens. We randomly replaced 15% of the tokens with a special MASK token. We swapped another 2%  
282 with another token at random; this adds a limited amount of noise, encouraging the model to learn a more  
283 robust and generalizable representation of patient trajectories. As shown on Panel C of Figure 2, the MLM  
284 part of M-BEHRT is a transformer-based architecture that generates probabilities for each token in the  
285 vocabulary, computed using softmax over the model's output logits, as a multilabel learning task.

286 We first split the dataset into a training (90%) and a validation set (10%) in order to prevent overfitting.  
287 Then, all the embeddings from the training set are randomly initialized and fed to the MLM. We use  
288 Bayesian optimization to find the best set of hyperparameters, with precision as a criterion. For robustness,  
289 we run the model five times with five different random seeds for the sequence masking, and use as final  
290 token embeddings for the downstream classification tasks the mean values of standardized embeddings  
291 from these five runs.

292 The pretraining task solely concerns tabular data, to establish effective representations of tabular events  
293 within the patient trajectory. For text data, running an MLM on the whole medical corpus would require  
294 more computational resources than available.

## 295 2.3.3 Binary Classification

296 We now describe the architecture of M-BEHRT, a deep neural network to learn binary classifiers from  
297 patient trajectories. M-BEHRT is the combination of two architectures: Tabular BEHRT, which learns from  
298 patient trajectories built from structured data; Text BEHRT, which learns from patient trajectories built  
299 from free text.

300 Tabular BEHRT consists in using labeled data to fine-tune for classification the network obtained by  
301 pre-training on patient trajectories built from structured data. As shown on Panel C of Figure 2, only the  
302 last layer is different between pre-training and fine-tuning: here the patient history embeddings are fed to a  
303 single feed-forward layer with sigmoid activation.

304 The architecture of Text BEHRT is illustrated on Panel D of Figure 2. It is again a transformer-based  
305 model, which uses report embeddings obtained through the aggregation of DrBERT embeddings as  
306 described in Section 2.3.1.2. The same sampling strategy as the one depicted in the previous section is used  
307 for this task.

308 Finally M-BEHRT combines information from tabular data and free-text reports by integrating  
309 Tabular BEHRT and Text BEHRT using a cross-attention module(19). The cross-attention module extends  
310 the capabilities of traditional transformer architectures to handle multiple data modalities in a unified  
311 framework. Hence M-BEHRT is expected to harness the complementarity of the information encoded in  
312 different modalities to improve predictive power.

313 As shown on Panel E of Figure 2, logits from structured data trajectories and the text trajectories are  
314 computed using their respective models. The cross-attentions layer calculates attentions with the logits as  
315 key, value and query. Logits from Text BEHRT used as query interact with logits from Tabular BEHRT  
316 that represent key and value. The loss is backpropagated to the cross-attention module. To do so, logits  
317 must have same size. Therefore, logits from Text BEHRT are first fed through a single feed-forward layer  
318 to obtain an embedding of the same size as logits from Tabular BEHRT.

319 In contrast, cross-attention is used when there are two distinct sets of inputs. One set of inputs (the  
320 "query") interacts with another set (the "key" and "value"). The model attends to the "key" sequence to  
321 inform the processing of the "query" sequence. This is commonly used in models where input data needs  
322 to interact, such as translating a sentence in one language to another.

323 Because the labeled data is typically imbalanced, we implemented a stratified batches strategy, which  
324 consists in loading the same proportion of positive and negative samples for each batch, with replacement  
325 for the positive instances (the minority class). This sampling strategy allows us to train on balanced batches.

## 326 **2.4 Comparison baselines**

327 To evaluate our models, we developed several comparison baselines. The first is the NPI measured  
328 at the date of diagnosis, a tool that is currently used in the clinic to predict prognosis. In addition, we  
329 developed baselines using classical machine learning methods: random forests classifiers (RF), logistic  
330 regression (LR), and support vector machines (SVM). These machine learning models (RF, LR and SVM)  
331 use the same input data as M-BEHRT, but cannot directly use sequential information. For dynamic tabular  
332 data (procedure name, department name, binarized biological measurements), sequences of events are  
333 transformed into number of occurrences of events. Clinical features (age, therapies, tumor size, tumor grade,  
334 breast cancer molecular subtype and number of nodes) are kept static, using their values at the time of  
335 diagnosis. Regarding free-text reports, we created a table where each feature of the report embeddings  
336 (of 768 dimensions) becomes a column. We imputed missing values with zero (0) for both of the inputs.  
337 For M-BEHRT, outputs from tabular data baselines and from text data baselines (specifically their logits)  
338 constitute inputs to a secondary model (meta-model) which makes the final prediction.

339 In order to consider class imbalance and prevent the model from being biased towards the majority class,  
340 we choosed the strategy of assigning different weights to each class during training. These weights are  
341 inversely proportional to class frequencies in the training data. By penalizing the majority class, the model  
342 is ensured to have enhanced performance on minority classes.

## 343 **2.5 Model selection**

344 For model selection, we split the training data (8 289 patients, excluding the held-out data set of 520  
345 patients) into a training and a validation sets (respectively 90% and 10% of the data). For each method, we  
346 use Bayesian optimization (28) to find the optimal set of hyperparameters, using the Average Precision  
347 Score (APS) on the validation set as a performance criterion.

## 348 **2.6 Computational resources**

349 We used Python to code models and analyses pipelines for this study, in particular scikit-learn (29) for  
350 the classical machine learning models, hyperopt (28) for Bayesian optimization, spaCy (30) for natural  
351 language processing tasks, and PyTorch (31) for the implementations of Tabular BEHRT, Text BEHRT and  
352 M-BEHRT, which are built on that of BEHRT (11). The masked language model and DFS classification  
353 model were computed on NVIDIA A40-46GB Graphical Processing Units (GPU).

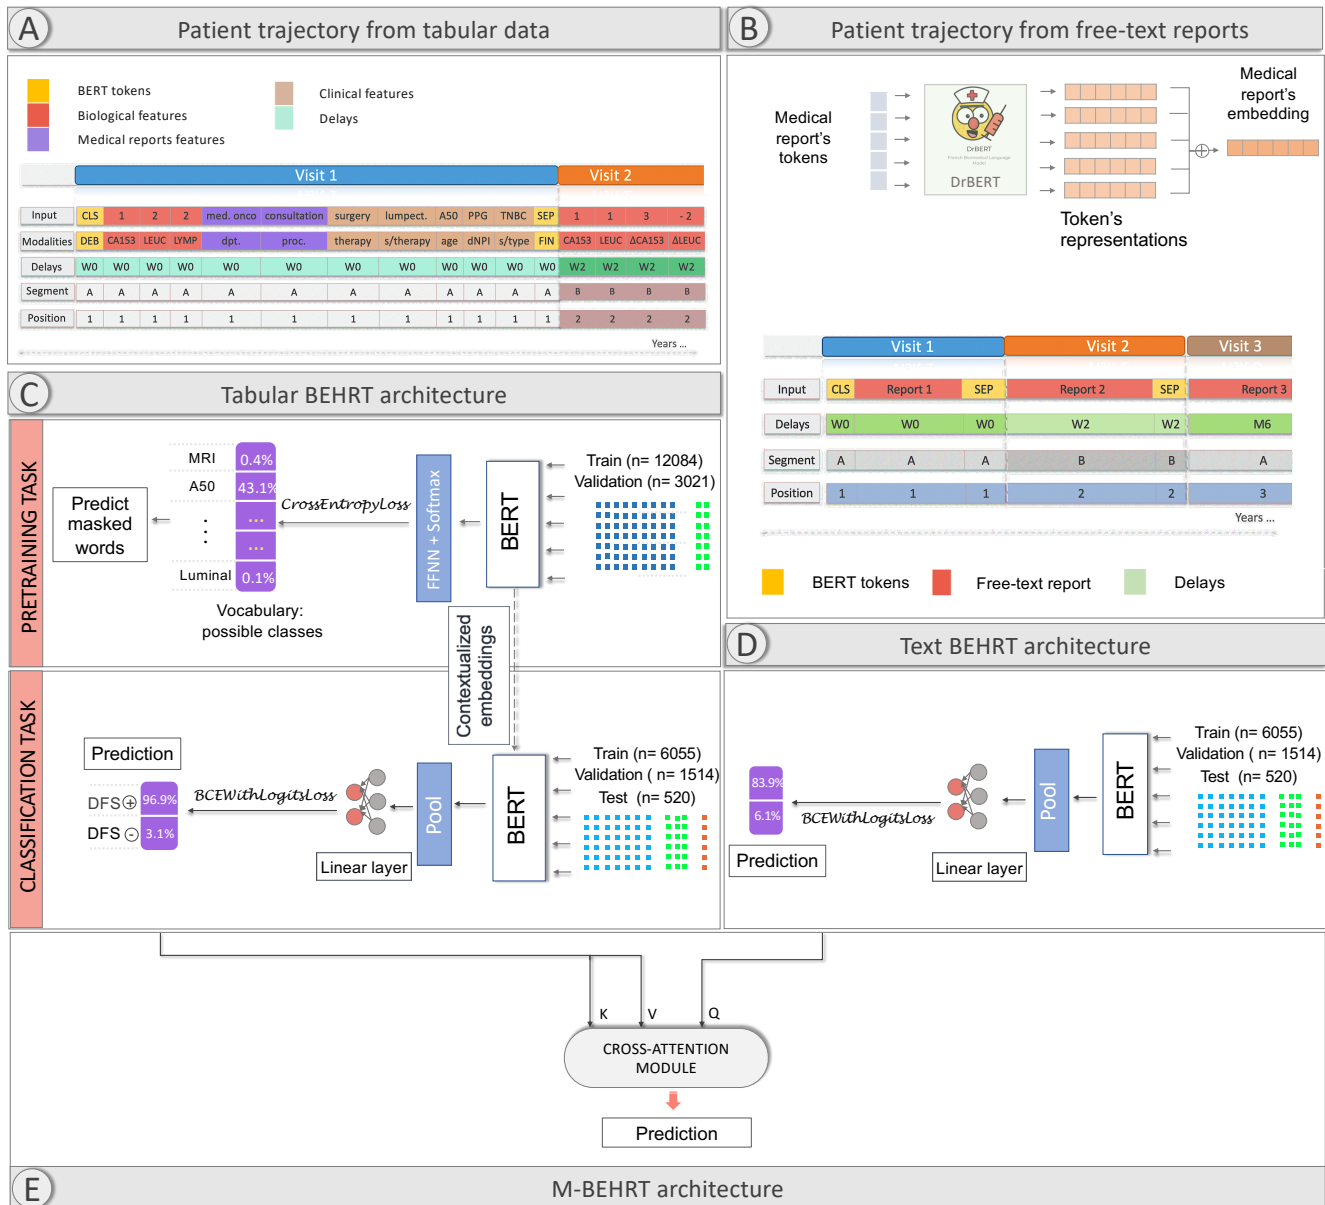

**Figure 2.** M-BEHRT architecture. Panel A: representation of patient trajectory using tabular data. Panel B: representation of patient trajectory using free-text reports. Panel C: architecture of Tabular BEHRT (learning from patient trajectories represented from tabular data as in Panel A). Panel D: architecture of Text BEHRT (learning from patient trajectories represented from free-text reports as in Panel B). Panel architecture of M-BEHRT, learning from both representations by combining Tabular BEHRT and Text BEHRT with cross attention.

### 3 RESULTS

#### 354 3.1 Patient trajectory embeddings

##### 355 3.1.1 Tabular patient trajectory embeddings

356 We first focus on the Masked Language Model (see Section 2.3.2) and evaluate the quality of the patient  
357 trajectory embeddings learned during the pre-training phase of Tabular BEHRT.

358 The optimal hyperparameters we identified for the MLM are 5 hidden layers with 12 attention heads,  
359 a hidden size of 144, an intermediate layer size of 133, a training duration of 120 epochs, using Adam  
360 optimizer with a learning rate set to 1e-3 and a batch size of 64.

361 To assess the performance of the MLM, we ran the model five times with five different random seeds for  
362 the sequence masking. We also compute a baseline by running the MLM on a data set in which tokens have  
363 been randomly reordered within each sequence. This approach disrupts the inherent sequential structure  
364 of the data, and creates a scenario where the model should not be able to rely on contextual relationships  
365 between tokens. Hence, comparing the MLM's performance on shuffled sequences against its performance  
366 on original sequences offers a benchmark for assessing the impact of contextual information on the model's  
367 predictive capabilities. The precision of these models (proportion of correctly predicted masked tokens) on  
368 the held-out validation set is shown on Figure S5 in the Supplementary Material.

369 The MLM is able to predict masked tokens with a precision of 72% on the validation set, a performance  
370 that is not significantly different from the one on the training set, highlighting the absence of overfitting.  
371 In addition, this precision is significantly higher than the precision of 55% obtained when shuffling the  
372 sequences, which shows that the MLM does indeed capture contextual information. We also note that the  
373 precision of the MLM of BEHRT reported by Li et al. (11) on sequences of diagnoses is of 66%. While it  
374 is difficult to compare this performance to ours due to the different nature of the tasks, it indicates that the  
375 MLM provides embeddings of sufficient quality to perform supervised learning in a second stage.

376 We further evaluate embeddings generated by the MLM by visualizing token embeddings through two-  
377 dimensional plotting along the first two components of a t-distributed Stochastic Neighbor Embedding  
378 (t-SNE) as shown on Figure 3. This figure shows how the MLM capture semantic relationships between  
379 tokens and contextual information. Tokens belong to the same modality (therapies, variation in biological  
380 features, breast cancer subtypes) tend to cluster together, with the exception of procedures and departments,  
381 which tend to be mixed together. This is however unsurprising, as some procedures and departments are  
382 tightly linked; for example, panel F shows that the embedding of the “nuclear medicine” service is quite  
383 close to the embeddings of “radiology”, “scanner” and “MRI” procedures, while panel D shows that the  
384 embedding of the “radiotherapy” service is quite close to the embeddings of several procedures all relating  
385 to the proposal, prescription, initiation, unfolding and ending of treatment by radiotherapy.

### 386 3.1.2 Medical reports embeddings

387 We first evaluate the quality of the medical reports embeddings obtained by pooling tokens embeddings  
388 extracted from DrBERT by visualizing them after their projection into a 2D space using t-SNE. The  
389 proximity of reports within this space corresponds to their semantic similarity. As shown in Figure 4, this  
390 visualization provides a comprehensive overview of the clustering patterns, demonstrating the potential of  
391 DrBERT embeddings in representing French medical text data.

392 This figure shows clusters of reports written in the same departments. Additionally, it display proximity  
393 between clusters that arise from similar departments. The Panel A groups all reports associated with  
394 radiology, including “mammography”, “MRI”, “ultrasound”, or “scintigraphy”. The same pattern is  
395 observed in Panel D, which contains the “generic” reports as those related to “discharge”, “external care”  
396 or “information”, and in Panel B, with clusters relating to cytology (“anatomocytopathology”, “cytology”).  
397 Lastly, Panel C displays reports from various departments positioned closely together.

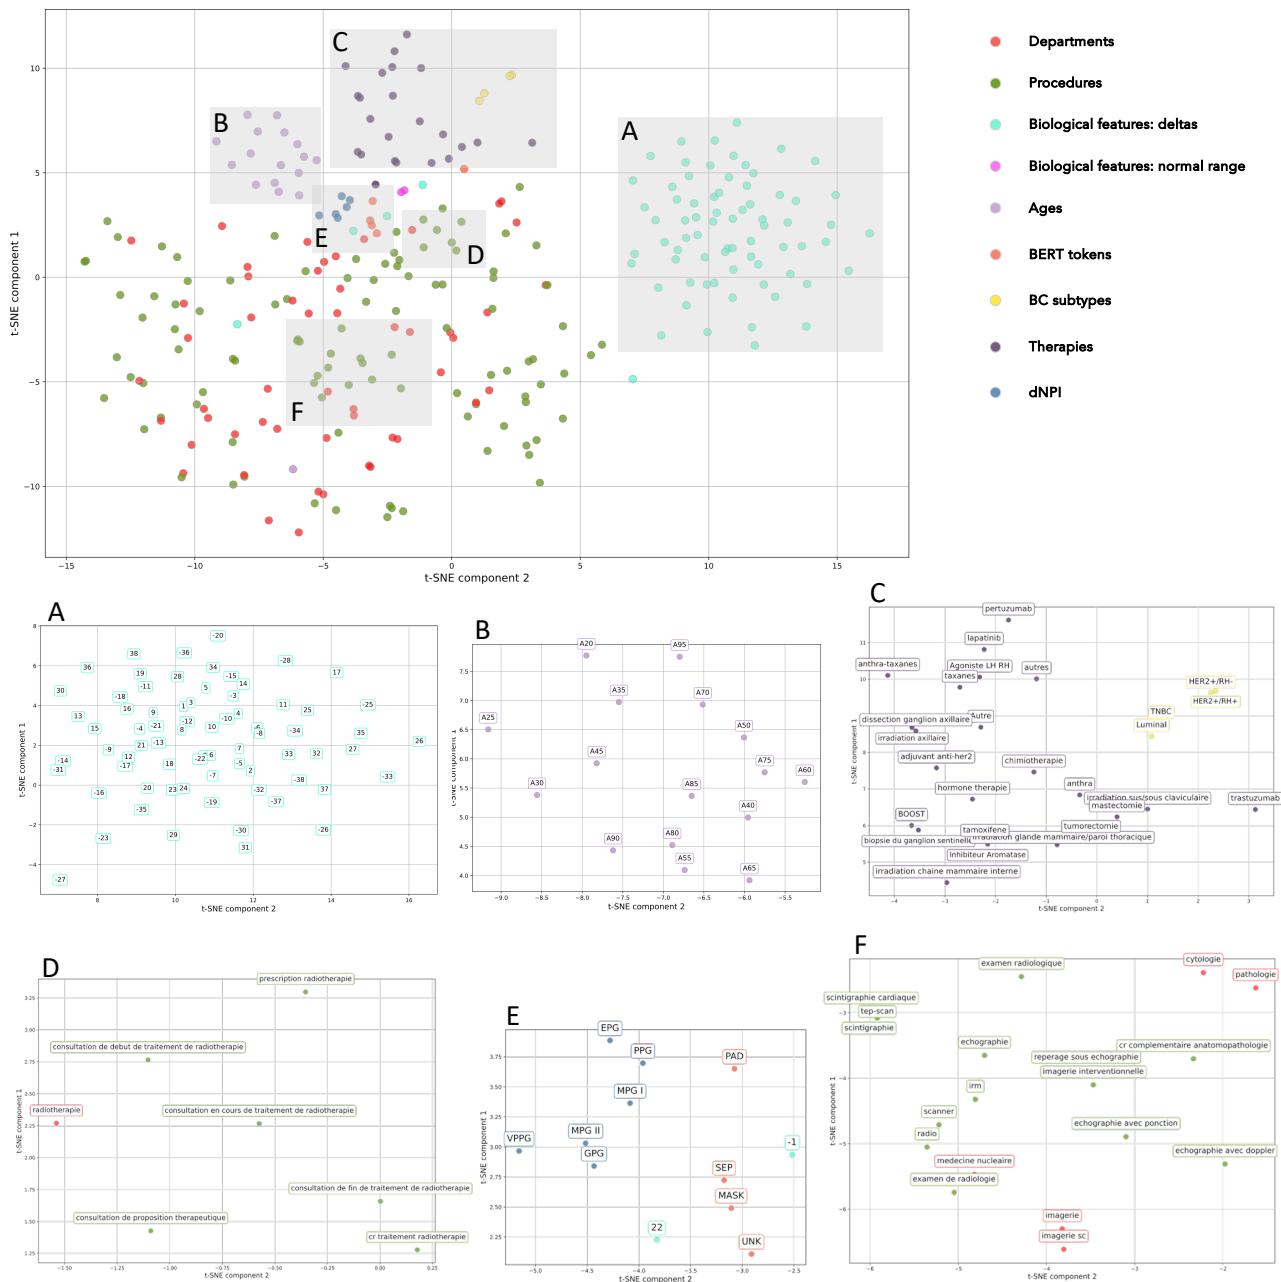

**Figure 3.** t-SNE of Tabular BEHRT tokens embeddings as learned by the Masked Language Model. Panels A through F zoom in on specific section of the plot. Panel A corresponds to a cluster of deltas in biological measurements. Panel B shows that age tokens cluster together. Panel C shows that therapy token, on the one hand, and breast cancer subtypes, on the other, cluster together. Panel D and F show two different clusters of procedures and departments. Panel E show that dNPI tokens cluster together, as well as BERT special tokens.

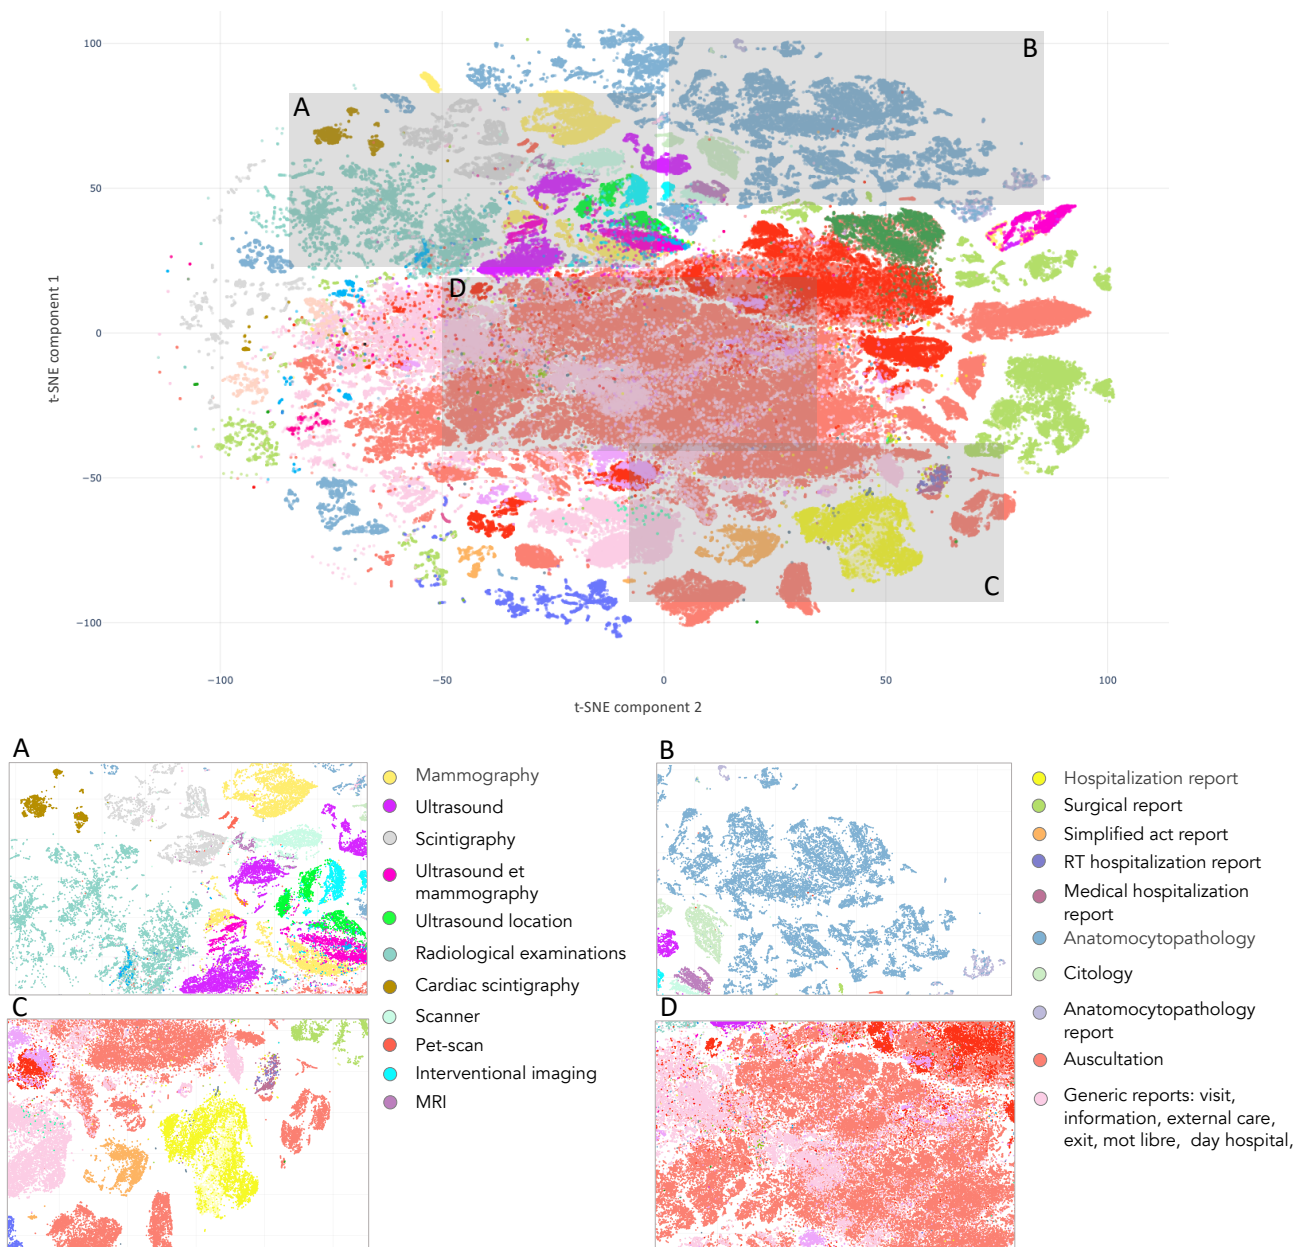

**Figure 4.** t-SNE of Text BEHRT medical reports embeddings. Each panel correspond to a different departments' reports with similar information, cluster together.

## 398 3.2 DFS prediction

### 399 3.2.1 Comparison of M-BEHRT with baselines

400 We report on Figure 5 the ROC curves on the test set of M-BEHRT trained with optimal hyperparameters  
 401 (see Section 2.5; learning rate of  $10^{-3}$ , batch size of 64, Adam optimizer, 6 epochs of training), as well as  
 402 of the comparison baselines described in Section 2.4.

403 Figure 5 shows that all methods perform significantly better than a random classifier (AUC-ROC of 0.5).  
 404 Moreover, M-BEHRT outperforms all comparison machine learning models.

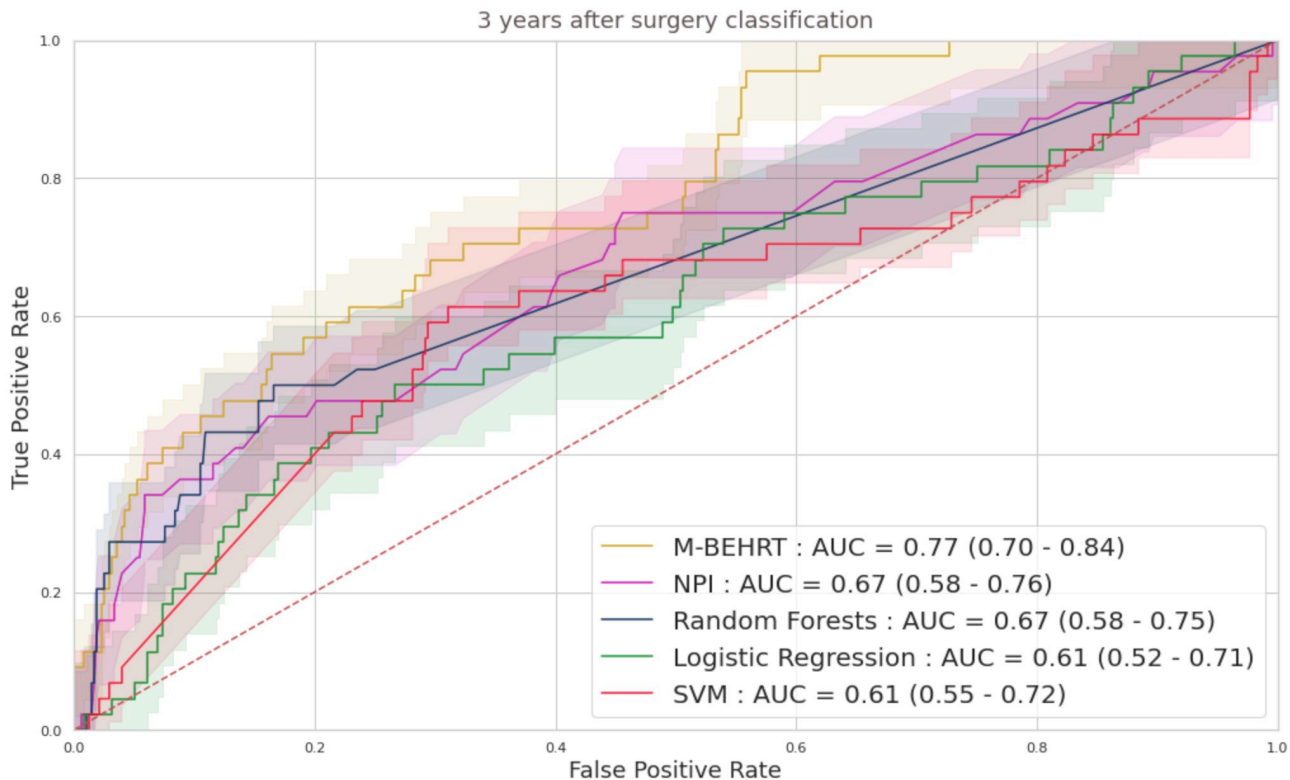

**Figure 5.** ROC curves M-BEHRT with the baselines for the prediction of disease-free survival 3 years after surgery, on the test set.

### 405 3.2.2 Ablation study

406 To better understand the contribution of each modality to the performance of M-BEHRT, we first compared  
407 it to the individual performance of its components Tabular BEHRT and Text BEHRT. Figure 6 reports ROC  
408 curves for all three approaches, on the test set. The optimal hyperparameters for Tabular BEHRT were a  
409 learning rate of  $10^{-4}$ , a batch size of 16, Adam optimizer, and 5 epochs of training; for Text BEHRT they  
410 were a learning rate of  $5 \cdot 10^{-4}$ , a batch size of 32, Adam optimizer, and 99 epochs of training.

411 Although they use different information, Tabular BEHRT and Text BEHRT achieve similar performance  
412 on both tasks, highlighting that Text BEHRT can capture relevant information in unstructured medical  
413 reports. The combination of both models through cross-attention slightly improves their respective  
414 performance, demonstrating the synergistic effect of integrating the strengths of both Tabular and  
415 Text BEHRT into a single unified model.

416 We also performed an ablation study to better understand the contribution of each tabular modality  
417 to the performance of Tabular BEHRT. Figure 7 shows the areas under the ROC curves obtained on  
418 the test set when removing some of the modalities from Tabular BEHRT. This figure shows that dNPI  
419 contributes the most to the performance. However, the addition of the other features, in particular the  
420 remaining clinical features (including age and more notably therapies), increases performance substantially.  
421 Biological features contribute the least to performance, although they still contain information, as they  
422 allow for better-than-random prediction. However, it seems that this information is redundant with that  
423 captured by the other features. Performance also drops substantially if information about the nature of the  
424 medical visit (department and procedure) is omitted. These observations are consistent across both tasks.

| Models              | AUC Scores            |
|---------------------|-----------------------|
| M-BEHRT             | 0.77<br>[0.70 – 0.84] |
| NPI                 | 0.67<br>[0.58 – 0.76] |
| Random Forests      | 0.67<br>[0.58 – 0.75] |
| Logistic Regression | 0.61<br>[0.52 – 0.71] |
| SVM                 | 0.61<br>[0.55 – 0.72] |

**Table 1.** AUC scores comparison for M-BEHRT and the baselines for the prediction of disease-free survival 3 years after surgery, on the test set. M-BEHRT significantly outperforms the other methods (DeLong test in Figure S22 in the Supplementary Material).

425 We also provide in the Supplementary Material a comparison of Tabular BEHRT with baselines that  
426 only make use of tabular information (Figure S6 in the Supplementary Material) and a comparison of  
427 Text BEHRT with baselines that only make use of text information (Figure S7 in the Supplementary  
428 Material). In both cases, the transformer-based approaches outperformed all comparison partners.

### 429 3.2.3 Performance of M-BEHRT per cancer subtype

430 Figure 8 presents the AUC-ROC of M-BEHRT on the test set, stratified by patient age, tumor grade,  
431 molecular subtype, or node status. M-BEHRT is better at predicting DFS at three years on older patients,  
432 with at least one affected lymph node. Stratification of results by NPI range is available on Figure S8 in the  
433 Supplementary Material.

### 434 3.2.4 Model interpretation

435 To better understand the predictions of M-BEHRT, we used the CAPTUM (32) implementation of the  
436 integrated gradients (IG) method (33) to attribute the predictions of either Tabular BEHRT or Text BEHRT  
437 to their input features. This allows us to highlight, for a given input sequence of visits, the elements that  
438 contributed to the label.

439 Overall, Tabular BEHRT mainly uses NPI tokens to correctly identify relapse or death for samples from  
440 the poor prognosis groups (VPPG and PPG), or to correctly identify DFS for patients from the good  
441 prognosis groups. What is more interesting, however, is to look at the tokens that Tabular BEHRT uses  
442 to accurately predict relapse or death for samples from the good and moderate prognosis groups, as they  
443 might provide critical insights into the aggressiveness and progression of the disease. They point towards  
444 having a high number of multidisciplinary consultation meetings (“RCP” in French), a high number of  
445 consultations overall, a second surgical procedure (within one year of the first one), or abnormal values for  
446 the CA15-3 and the LYMP biological markers. Moreover, Tabular BEHRT uses well-documented factors  
447 in the literature to predict a positive DFS status such as age.



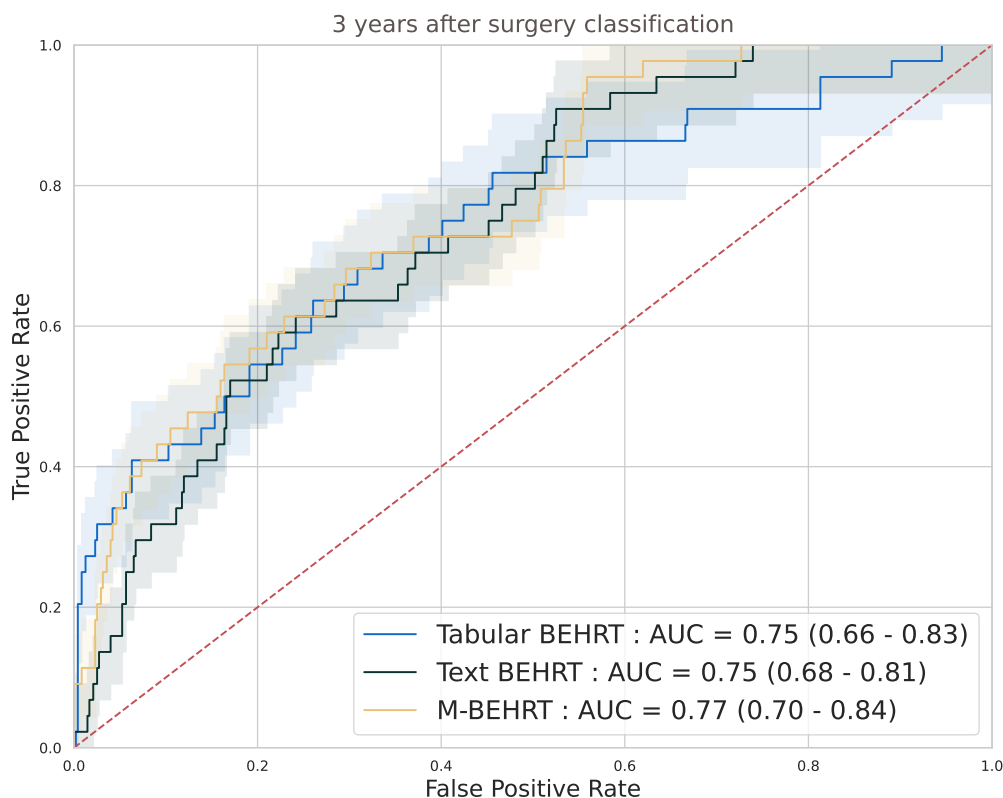

**Figure 6.** ROC curves comparing Tabular BEHRT and Text BEHRT against their combined model M-BEHRT for the prediction of disease-free survival 3 years after surgery, on the test set.

448 The interpretation of Text BEHRT's predictions shows that the model mostly relied on the entire  
449 sequence of the reports from the diagnosis to the index date to make its prediction, which is represented  
450 by the CLS token. We found this pattern in many true positive (correctly identifying death or relapse)  
451 samples. Moreover, Text BEHRT relies on reports that show information regarding the characterisation of  
452 a suspicious tumor, but this is not in and of itself indicative of a future relapse.

453 Finally, in order to gain a more global understanding of the model, we investigated the most predictive  
454 reports for a positive DFS status and for a negative DFS status. We set a threshold regarding the given  
455 attribution for each medical report. We collect all the reports with an attribution above this threshold. This  
456 yielded 921 reports that are predictive for negative DFS status in the entire corpus, and 1 720 reports that  
457 are predictive for positive DFS status. For each reports collection, we determined the 30 most frequent  
458 sequences (of 3 to 9 words) for both groups. We then listed the most frequent sequences for the DFS  
459 negative group that are not found in the DFS positive group. The resulting sequences of words can be found  
460 in Table 2.

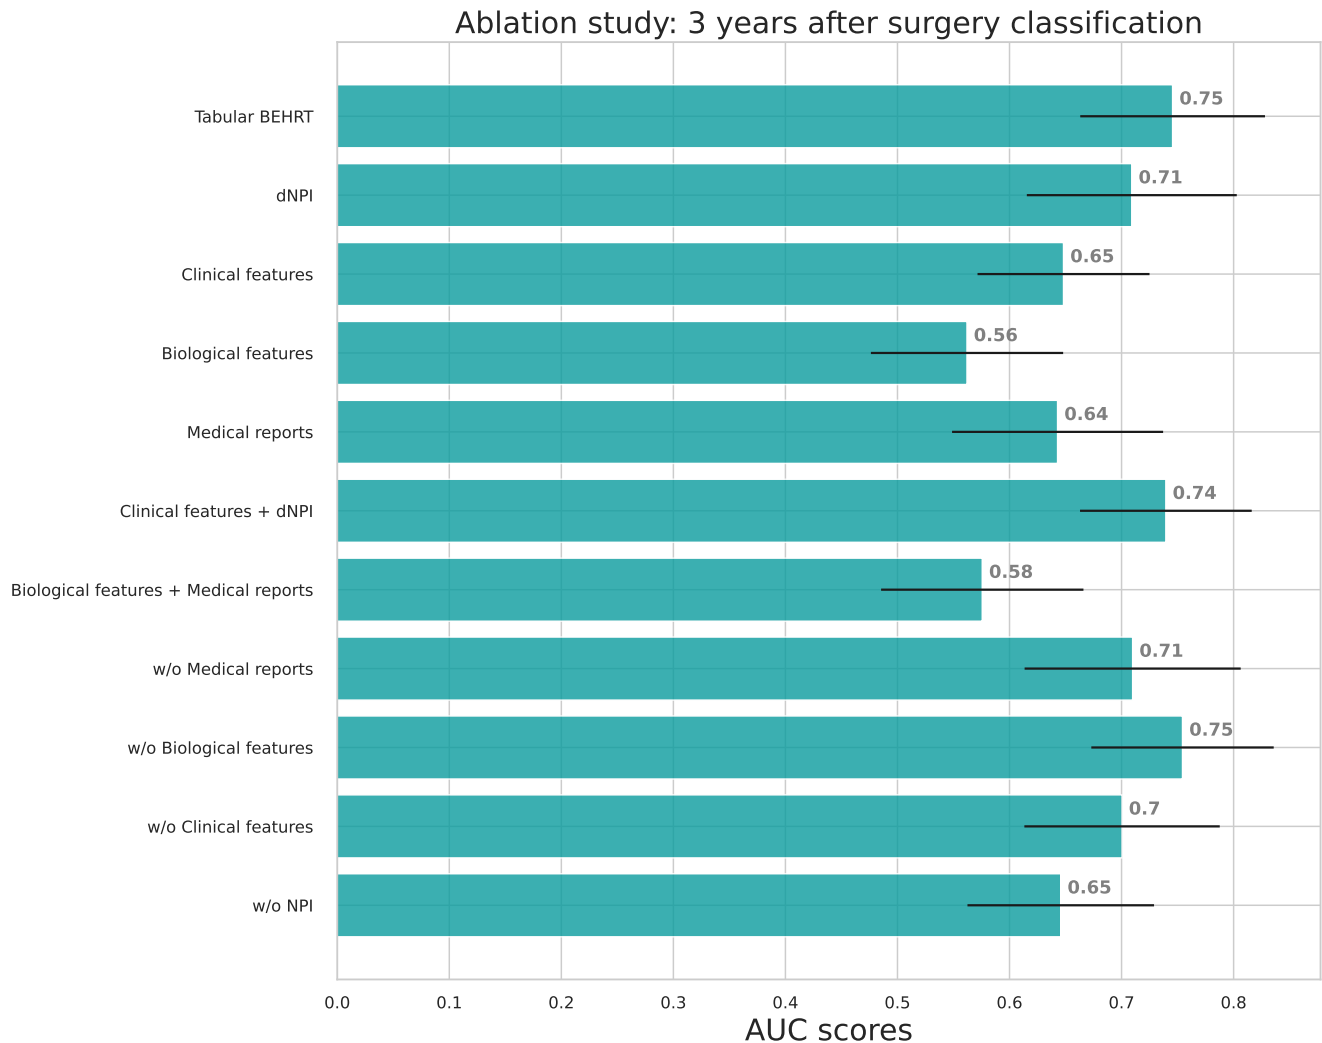

**Figure 7.** Ablation studies AUC-ROC on the test set for Tabular BEHRT. We present results for the full model (Tabular BEHRT), then using only one of the 4 modalities (dNPI, clinical features, biological features, medical visits), two modalities (dNPI+clinical or biological+visits), then removing one of the 4 modalities. Here “medical records” stands for features extracted from the medical record headers, that is to say, visit department and procedure. Performance scores are presented on the test set.

461

462 Some of these sequences were obtained by combining overlapping sequences. We then plotted survival  
463 curves to compare patients that have reports containing one of these sentences and patients that do not.  
464 DFS is the event and the log-rank test is used to compare the populations. We show here two such curves,  
465 corresponding to sentences showing the most significant sequences: Figure 9 is for a sequence that translates  
466 to “breast in partial involution with less than 50% glandular tissue and Figure 10 is for a sequence that  
467 translates to “axillary lymphadenectomy”.

468 For the first example (Figure 9), the survival curves suggest that patients with this feature are most likely  
469 to relapse than others. This feature defines a specific state of breast tissue where the glandular tissue is  
470 replaced by adipose tissue. This process naturally occurs with aging and after menopause. Therefore, this  
471 feature could have an impact on DFS simply because it is related to the patient’s age, which is already

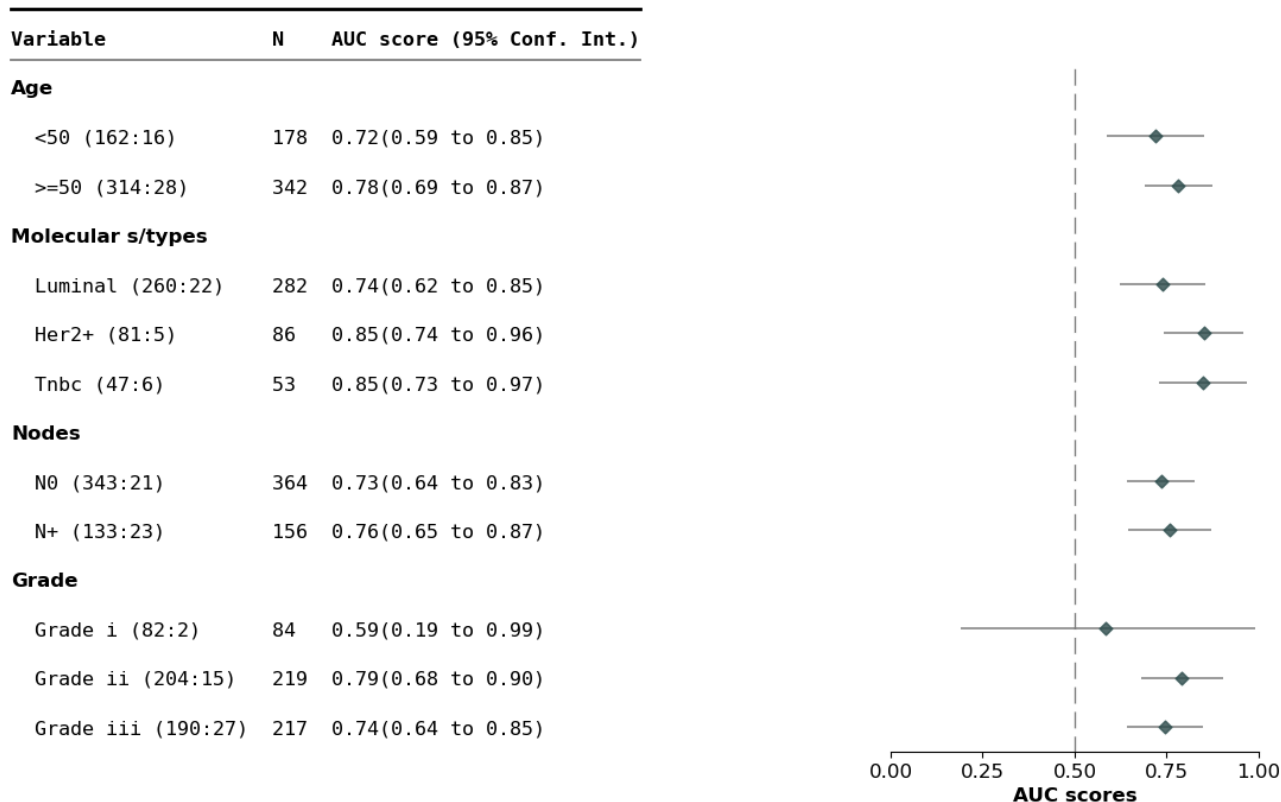

**Figure 8.** AUC-ROC of M-BEHRT on the test set stratified by patient age, cancer grade, molecular subtype and node status

472 a prognostic factor. However, when compared with 2 age groups (see Figure S11 in the Supplementary  
473 Materials), it added more information on the survival than just > 50 years old and < 50 years old. Young  
474 patients with this feature represent the worst prognostic groups.

475 Although mammary involution is not a commonly used prognostic factor, several studies have showed a  
476 link between involution and breast cancer risk (34, 35); the underlying biological process could maybe also  
477 explain a hightened risk of relapse in young patients presenting abnormal mammary involution.

478 The second plot (Figure 10) compared a population with the feature “axillary lymphadenectomy” and a  
479 population without. This feature is a mention of removing lymph nodes from the armpits. This information  
480 is associated with the potential affection of axillary nodes, which is found to be predictive for BC relapse.

## 4 DISCUSSION

481 In this paper, we proposed several novel deep learning architectures inspired by BEHRT to model patient  
482 trajectories using multimodal data extracted from EHRs. As the original BEHRT model, Tabular BEHRT  
483 considers structured data to describe each medical event. In addition, it considers multiple modalities  
484 (biological lab results, clinical information, department and procedure names) simultaneously. By contrast,  
485 in Text BEHRT each visit is described via the content of free text medical reports. Finally, M-BEHRT  
486 combines both models through cross-attention. Our work is motivated by applications to oncology, and  
487 applied to the prediction of disease-free survival for breast cancer patients.

| Sequence meaning in English                                                             | Description                                                                                                                                                                                                                                                                                                                                                           |
|-----------------------------------------------------------------------------------------|-----------------------------------------------------------------------------------------------------------------------------------------------------------------------------------------------------------------------------------------------------------------------------------------------------------------------------------------------------------------------|
| Breast in partial involution with less than 50% glandular tissue                        | Adipose involution is a natural process where glandular tissue is gradually replaced by fat tissue, often as a result of aging or hormonal changes. Here, the glandular tissue makes up less than half of the total breast composition. While age is a risk factor for breast cancer, lobular involution is associated with a reduced risk of breast cancer (34, 35). |
| Previous treatment with human growth hormone, without risk factors for CJD transmission | Treatment with human growth hormone can lead to the transmission of Creutzfeldt-Jakob disease (CJD). This information is a medical administrative criterion checked before surgery.                                                                                                                                                                                   |
| With axillary lymphadenectomy                                                           | Until recently, axillary lymph node dissection was standard procedure in the case of involvement of lymph node in breast cancer, one of the main known risk factors for relapse or death (36).                                                                                                                                                                        |
| Palpable mass                                                                           | Palpable breast lumps are the most common presentation of breast disease.                                                                                                                                                                                                                                                                                             |
| Solu-Medrol, 80mg                                                                       | Solu-Medrol is one brand name for methylprednisolone, a corticosteroid used in BC to manage the side effects of taxane-based chemotherapy (37).                                                                                                                                                                                                                       |
| Lovenox 0.4 mL                                                                          | Lovenox is one brand name for enoxaparin sodium, a low molecular weight heparin used as anticoagulant medication. It is used to prevent and treat venous thromboembolisms, for which cancer patients are at higher risk (38).                                                                                                                                         |

**Table 2.** Most frequent sequences found in reports with high attribution for DFS- (relapse/death) instances but not for DFS+ instances, in Tabular BEHRT.

#### 488 4.1 M-BEHRT achieves state-of-the-art or better prediction of DFS

489 Using very different information, Tabular BEHRT and Text BEHRT achieve AUCs on a held-out data  
490 set of 0.75 [0.66-0.83] and 0.75 [0.68-0.81], respectively, for the prediction of DFS 3 years after surgery.  
491 Combining them in M-BEHRT slightly increases predictive power, reaching an AUC of 0.77 [0.70-0.84].  
492 All three architectures outperform classical machine learning methods. M-BEHRT is therefore able to  
493 capture the sequential aspect of patient data throughout their medical journey, resulting in improved  
494 performance.

495 To date, most of the multimodal prognosis models for breast cancer use various types of medical images,  
496 as well as sometimes genetics data, combined or not with tabular information (biological measurements,  
497 clinical features). Moreover, endpoints vary between studies: DFS, but also overall survival or recurrence  
498 (sometimes separated between local, regional and distant); which can be measured 3 years after surgery  
499 as in the present work, but also at different time points. Finally, different studies use different criteria  
500 inclusions. All in all, this makes comparing our performance to other studies challenging. However, we  
501 note that M-BEHRT achieves better performance for the prediction of DFS after three years than the  
502 recent work of Han et al. (6), which uses ultrasound and mammography images combined with clinical,  
503 pathological and radiographic characteristics and reports an AUC of 0.739 on a held-out test set. In addition,  
504 the performance of M-BEHRT is in the same ballpark as that of Rabinovici-Cohen et al. (5), which predict  
505 recurrence at five years in patients who receive neo-adjuvant chemotherapy (AUC of 0.75 on a held out  
506 data set) using clinical features, immunohistochemical markers, and multiparametric magnetic resonance  
507 imaging, or González-Castro et al. (9), which achieve an AUC of 0.81 also for predicting recurrence at five  
508 years, but considering all cancer patients and using clinical features, immunohistochemical markers, and  
509 descriptors of clinical history such as the number and type of therapies.

510 In order to further evaluate the ability of M-BEHRT to predict DFS, we also performed the same study,  
511 but for the prediction of DFS 5 years after surgery rather than 3. This results in a smaller data set of 5 192

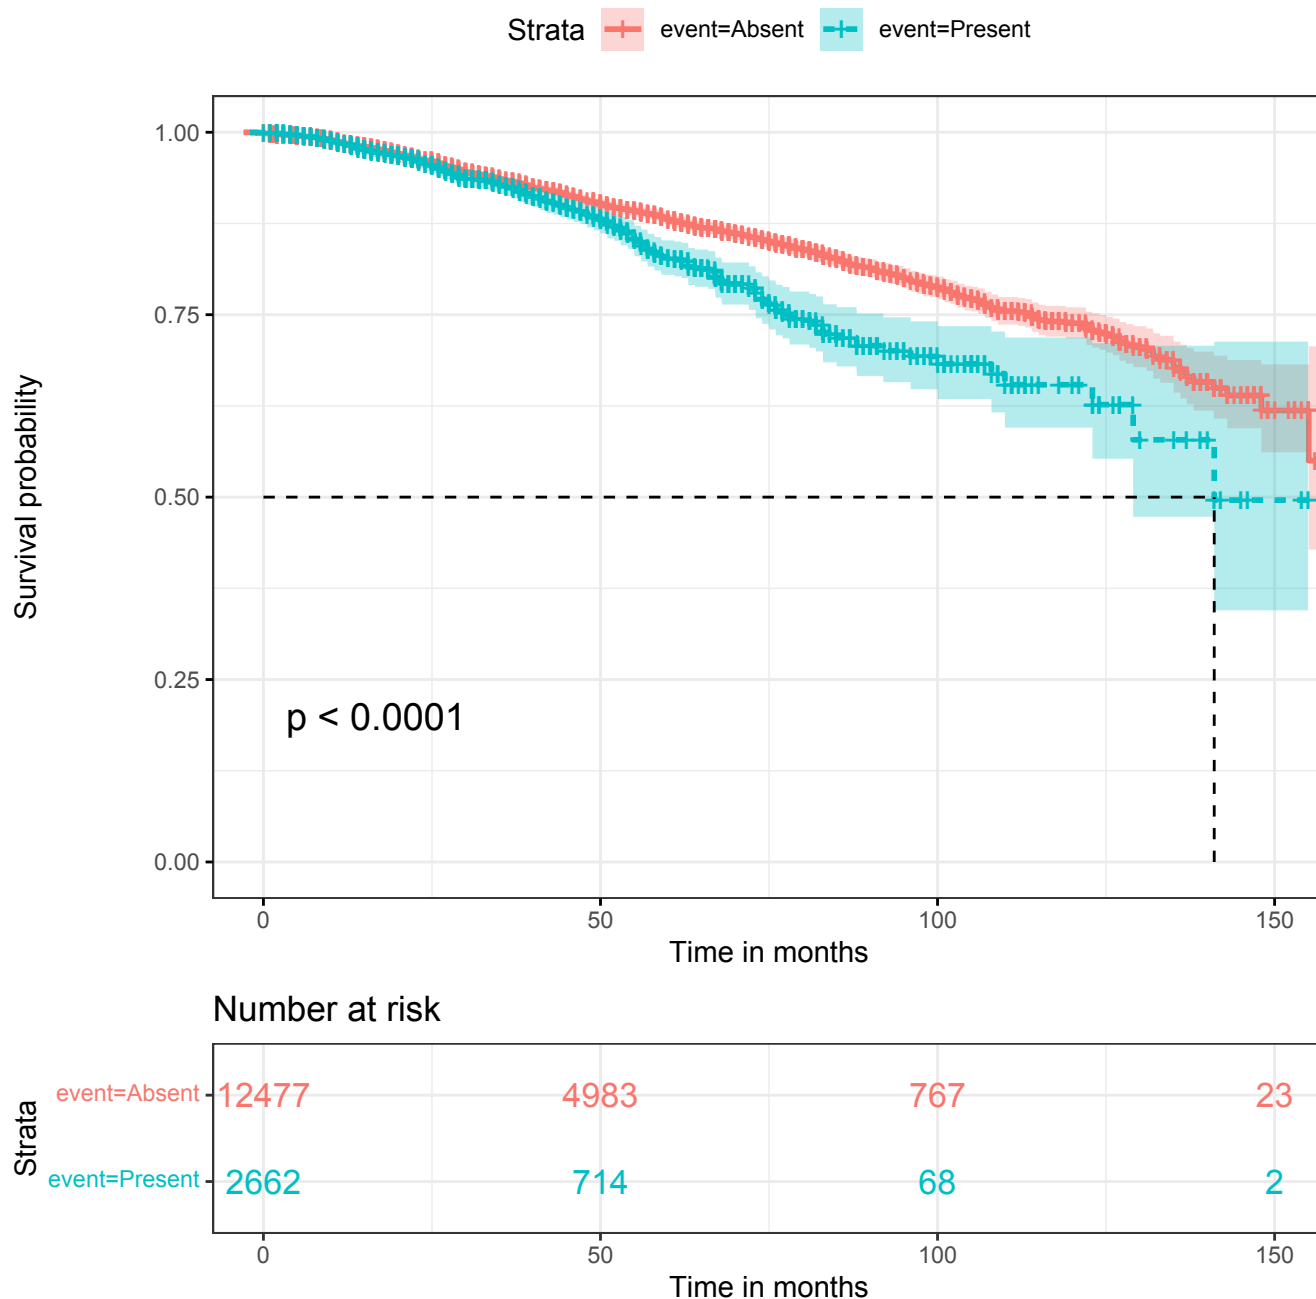

**Figure 9.** Survival plots for the sequence: “sein en involution adipeuse partielle avec contingent glandulaire inferieur a 50”, (*breast in partial involution with less than 50% glandular tissue*), Present or Absent in patients reports

512 patients. The test set is the same as for DFS 3 years after surgery, but now contains 17.1% of negative  
 513 samples. All results are available in the Supplementary Materials (Table S4 and Figure S10 for a description  
 514 of the data, and Figures S11-17 for the results). Our observations are similar to those made on the prediction  
 515 of DFS 3 years after surgery, although predicting DFS 3 years after surgery seems much easier than 5 years  
 516 after surgery (AUC of 0.77 vs 0.69). This is in line with previous observations that earlier events are easier  
 517 to predict than long-term ones (39).

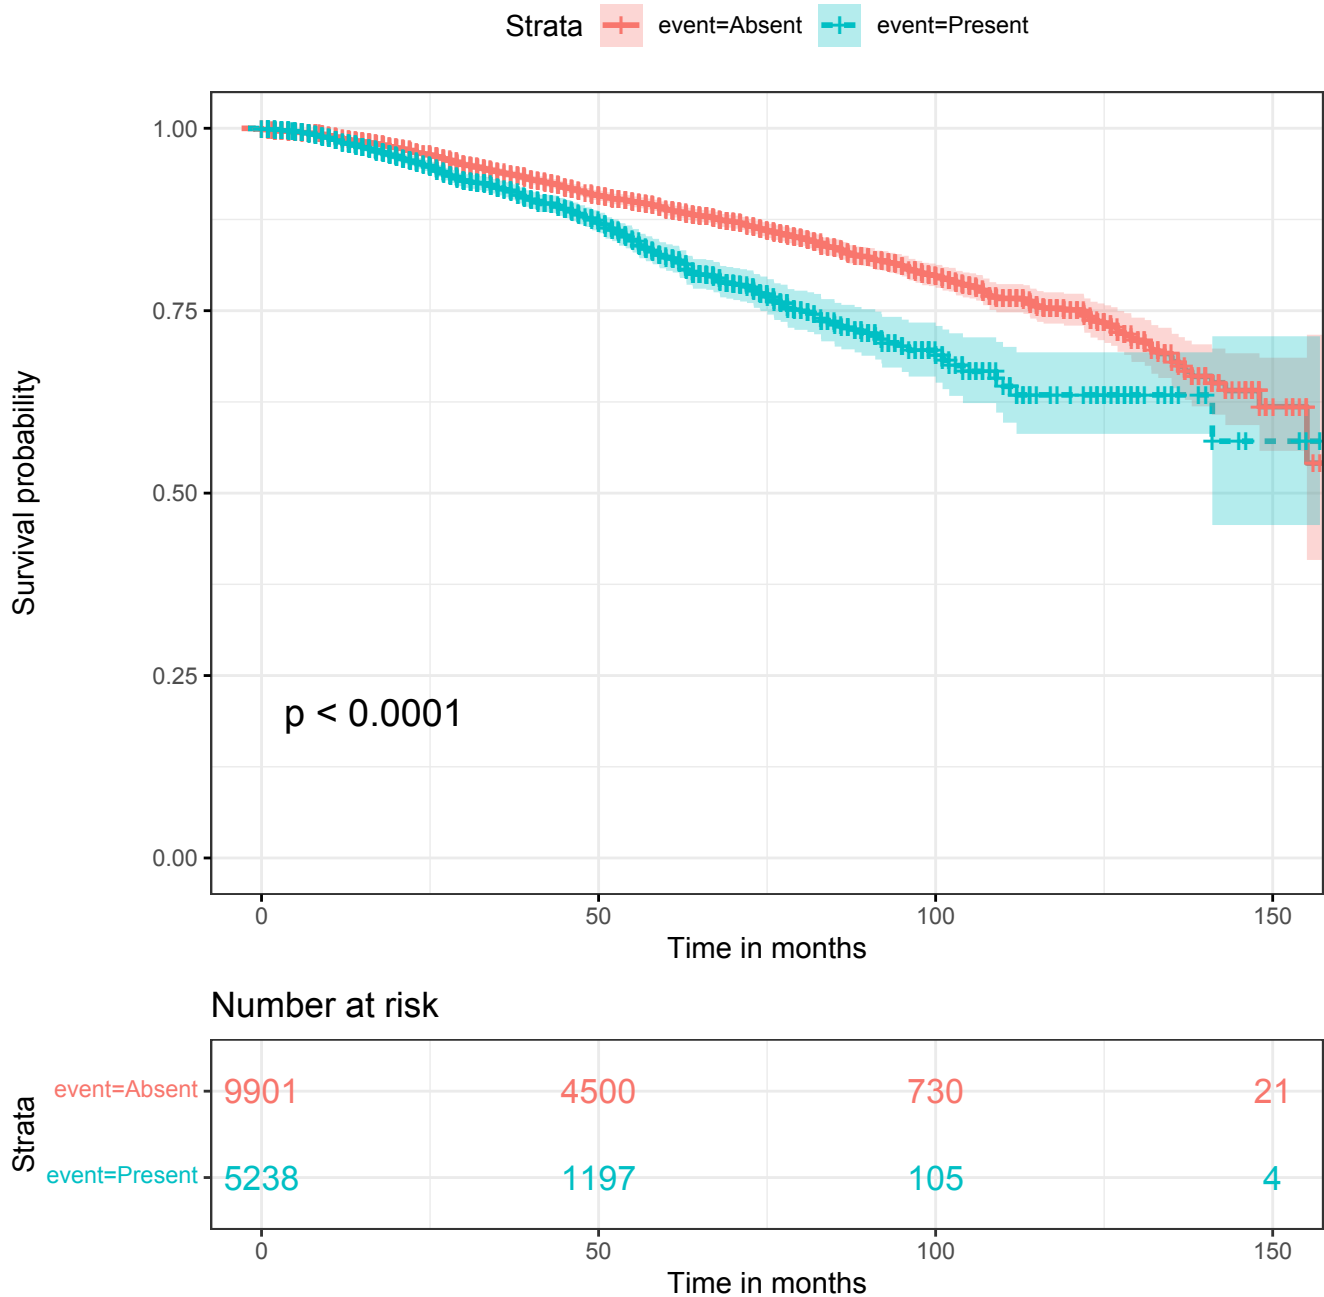

**Figure 10.** Survival plots for the sequence: “lymphadenectomie axillaire”, (*axillary lymphadenectomy*), Present or Absent in patients reports.

518 We stratified the data based on features that are expected to define patients with similar prognoses (age,  
519 grade, number of lymph nodes involved, molecular subtype). We found that the prediction ability of  
520 M-BEHRT varies depending on subgroups and that the model works better on older patients with more  
521 aggressive disease (at least one lymph node involved). In addition, M-BEHRT is better at predicting relapse  
522 after 5 years than after 3 years for luminal tumors, suggesting that it correctly identifies predictive factors  
523 with long term influence for these tumors that tend to recur later than others (40).

524 There are however some limitations to the scope of our study. In particular, our findings are restricted to a  
525 very specific cohort of patients who received adjuvant chemotherapy. We also have not been able to validate

526 our findings on an external validation group, due to privacy concerns limiting the access to EHR of other  
527 centers; it is possible that our models have captured idiosyncrasies of Institut Curie that do not apply to  
528 patients from other hospitals. However, our work shows that it is possible to learn from multimodal patient  
529 trajectories built from dynamic tabular data and the content of free-text reports written by practitioners at  
530 each medical visit, and paves the way for future research in understanding breast cancer prognostic factors.

## 531 **4.2 M-BEHRT learns on small data sets**

532 An important aspect of our study is that, unlike most work published to date using transformers for  
533 EHR data, which use millions of patients for pretraining and tens to hundreds of thousands of patients  
534 for fine-tuning (11, 13, 12), the datasets we use here are of much smaller sizes: about 15 000 patients  
535 for pretraining, and 5 000 to 8 000 patients for fine-tuning. That it is possible to apply such methods to  
536 much smaller data sets is very encouraging for future research, as many studies, especially on very specific  
537 diseases and endpoints, only have access to a limited number of patients.

538 However, despite the small sample size, our study has an advantage over those with larger datasets'  
539 studies because our learning data includes only adjuvant-treated breast cancer patients. This specificity has  
540 enabled the model to learn more precise embeddings and improve the accuracy of relapse prediction.

541 Keeping the same pretrained model, we experimented with further reducing the number of patients used  
542 for training the classifier. To this end, we created smaller training sets by randomly selecting subsets of the  
543 training data, starting from 10 samples, and compared on the test set the performance of Tabular BEHRT  
544 and classical machine learning algorithms trained on these small training sets. Our results, shown on  
545 Figure S20 in the Supplementary Material, show that Tabular BEHRT clearly outperforms the classical  
546 machine learning algorithms, especially random forests, in the few-shot learning setting (when training set  
547 sizes are very small), achieving better-than-random performance with as little as 10 training samples and  
548 outperforming NPI with a few hundred training samples. We attribute this performance to the ability of the  
549 pretraining phase to learn meaningful representations of patient trajectories.

## 550 **4.3 M-BEHRT leverages the complementary nature of different modalities**

551 In order to better understand the contribution of the different modalities to the performance of  
552 Tabular BEHRT, we conducted an ablation study. The results show that, with the exception of the biological  
553 features, excluding one modality or more substantially reduces model performance. This indicates that  
554 Tabular BEHRT has the ability to leverage the complementary nature of the different modalities. In addition,  
555 clinical features (dNPI, age, molecular subtype and therapy) contribute the most to performance. This  
556 observation is consistent with previous studies on breast cancer relapse prediction (41, 42).

557 Although others have found the results of routine laboratory tests to be very informative for predicting  
558 breast cancer endpoints (4, 41), our study did not see strong added value of including biological markers  
559 on DFS prediction. This is particularly surprising regarding cancer antigen CA 15-3, which has been  
560 found in several studies to correlate to poor prognosis (43, 44) and recurrence (45, 41). In addition, Kim  
561 et al. (41) found that an increase in leukocyte count (LEUK) has a protective effect against breast cancer  
562 recurrence and that an elevated neutrophil count (PN) is associated with recurrence, although another  
563 study (4) did not find a significant association between DFS and variables describing leukocyte counts  
564 and counts or percentages of leukocyte subtypes. However, these features not entirely uninformative, as  
565 restricting Tabular BEHRT to the biological features modality still yields better-than-random performance  
566 (AUC of 0.56 for T1 and 0.61 for T2). One possible explanation is that the information contained in the  
567 biological features is also captured by the other modalities, as their evolution might be consistent with

568 cancer severity or subtype, or the choice of therapy. Our study is also limited in the number of available  
569 laboratory variables, as markers that were found informative in previous studies, such as hemoglobin, total  
570 protein, serum glucose, alkaline phosphatase, or international normalized ratio (41, 4) were not available  
571 (or not for enough patients) in our data.

572 Perhaps surprisingly, we do not see the same drastic increase in performance between Tabular BEHRT and  
573 M-BEHRT as others have observed in multimodal prediction of breast cancer prognosis when augmenting  
574 clinical data with imaging data (5, 6), although Text BEHRT leverages medical reports from radiologists or  
575 cytopathologists, which are based on medical images. Although this could be due to the aforementioned  
576 limitations of Text BEHRT, this could also be because Tabular BEHRT already achieves much better  
577 performance than models based solely on static clinical data.

#### 578 **4.4 M-BEHRT model interpretation points to possible prognostic factors**

579 The interpretation of M-BEHRT models through the integrated gradients method highlighted that  
580 Tabular BEHRT relies on well-documented prognostic features such as the age or the NPI (46, 2) to  
581 predict DFS status. Additionally, the model uses features that indicate a more aggressive breast cancer  
582 (number of multidisciplinary meetings, number of consultations, or a second surgical procedure), which  
583 can not be necessarily be considered as causes of cancer relapse but suggest a more difficult-to-treat cancer.

584 Regarding Text BEHRT, the model seems to rely mainly on reports that contain symptoms-related  
585 information or reports from imagery. When they occur before the first surgery, these information are to be  
586 expected, as we are studying a cohort of patients treated for breast cancer. However, if they occur after the  
587 first surgery, these features can indicate further investigations that are warranted by the difficulty to treat  
588 the primary tumor.

589 Let us note however that while deep learning model interpretation is still somewhat limited, it has the  
590 potential to offer a much more comprehensive interpretation of the roles played by different elements in  
591 the data, given how rich the data is. Moreover, the features that are highlighted as strongly contributing  
592 towards one label or the other are only doing so in conjunction with other features, which might be different  
593 from patient to patient. Moreover, the embedding pooling method that we have used to derive reports  
594 embeddings from their contents does not help with interpretability, as it does not allow to pinpoint specific  
595 parts of a medical report. Nevertheless, several potentially interesting text features (such as high mammary  
596 involution or axillary dissection) have been highlighted for their contribution to M-BEHRT predictions.  
597 Even though it is not yet clear how these features can be used as prognostic factors and incorporated in a  
598 model usable in the clinic, survival curves show that they are indeed informative of DFS even taken on  
599 their own.

#### 600 **4.5 Challenges of learning from long sequences of rich events**

601 In our approach, there is a tradeoff between the number of visits that can be considered and the amount of  
602 information that can be used to describe each visit, because the underlying BERT architecture is limited to  
603 processing 512 tokens. This number is arbitrary, but constrained by the memory usage of the self-attention  
604 mechanism. We have found this number to be sufficient for the DFS prediction tasks at hand and the  
605 available features and modalities. However, this might be too small for other applications, in which case  
606 one might want to use approaches that approximate the self-attention matrices so as to reduce their memory  
607 footprint, such as Big Bird (22) or Nyströmformer (23). In the present study, M-BEHRT outperforms both  
608 NPI and classical ML baselines, suggesting its ability to capture the structure of EHR data.



609 To the best of our knowledge, ours is the first study to use entire free text medical reports (in a language  
610 other than English) for breast cancer prognosis. There are several limitations to our approach. First, we  
611 used token embeddings learned on French clinical text that are not specific to breast cancer; it is possible  
612 that pretraining on breast cancer clinical text could improve the performance of our model. However,  
613 this requires considerable resources, both in terms of amount of clinical records available and computing  
614 power. Second, we build medical records embedding by simply pooling all token embeddings of a record,  
615 which is likely not be optimal for capturing the information contained in a report. Several authors have  
616 proposed using convolutional neural networks (CNN) or bidirectional long-short term memory architectures  
617 (Bi-LSTM) on top of token embeddings (20, 47, 48), which typically helps capturing the structure of  
618 text documents and could be an interesting future direction to explore for this research. Despite these  
619 shortcomings, our results demonstrate the ability of Text BEHRT to capture relevant information, as it  
620 performs on par with Tabular BEHRT.

621 Finally, M-BEHRT uses a cross-attention module to perform the multimodal fusion between  
622 Tabular BEHRT and Text BEHRT. This approach allows the contextual integration of information from  
623 both transformers, i.e, that each model can attend information from the other model, and thus enable a  
624 better exploitation of the complementarity between inputs. However, this requires that both tabular data  
625 and text data embeddings have the same size, and forced us to reduce the dimensionality of the embedding  
626 of sequences of reports from 768 (as provided by DrBERT) to 144 through a linear layer. This may result  
627 in an additional reduction of available information. However, this still results in a slight improvement of  
628 overall performance.

## 629 **4.6 Conclusion**

630 Overall, our study highlights the potential to predict DFS using solely longitudinal sequence of medical  
631 visits and evolution of clinical information and biological measurements. To the best of our knowledge,  
632 this is the first study predicting breast cancer endpoints from sequences of EHR data, whether considering  
633 solely multimodal dynamic tabular data, solely the contents of free-text reports, or combining both. Our  
634 results underscore the usefulness of such data for future research on prognosis modeling, and outline the  
635 importance of integrating medical information collected over time to gain previously unknown insights  
636 into the understanding of breast cancer evolution.

## **CONFLICT OF INTEREST STATEMENT**

637 The authors declare that the research was conducted in the absence of any commercial or financial  
638 relationships that could be construed as a potential conflict of interest.

## **ETHICS STATEMENT**

639 The studies involving human participants were reviewed and approved by the Institutional Review Board  
640 of Institut Curie (Paris, France). The patients/participants provided their written informed consent to  
641 participate in this study.

## **AUTHOR CONTRIBUTIONS**

642 Conceptualization: CAA, MD, MRZ, NMB

643 Data curation: JG, ED, AHP, AT

644 Formal analysis: NMB  
645 Funding acquisition: CAA, MRZ, FR  
646 Investigation: NMB, AT  
647 Methodology: CAA, MD, MRZ, NMB  
648 Project administration: CAA, NMB  
649 Resources: JG  
650 Software: NMB  
651 Supervision: CAA, MRZ  
652 Visualization: NMB  
653 Writing – original draft: CAA, NMB  
654 Writing – review & editing: CAA, NMB, MRZ, MD

## FUNDING

655 This project has received funding from the European Union’s Horizon 2020 research and innovation  
656 programme under the Marie Skłodowska-Curie grant agreement No 813533 and from the French  
657 government under management of Agence Nationale de la Recherche as part of the “Investissements  
658 d’avenir” program, reference ANR-19-P3IA-0001 (PRAIRIE 3IA Institute).

## ACKNOWLEDGMENTS

659 The authors thank Éric Daoud, Antoine Recanati and Charles Vesteghem for fruitful discussion and Johan  
660 Archinard for the technical environment maintenance.

## DATA AVAILABILITY STATEMENT

661 Electronic health records are considered sensitive data in the EU by the General Data Protection Regulation  
662 and cannot be shared via public deposition because of legal restriction in place to protect patient  
663 confidentiality. Data can only be accessed once approval has been obtained through the Institutional  
664 Review Board of Institut Curie.

## REFERENCES

- 665 1 .Ferlay J, Ervik M, Lam F, Laversanne M, Colombet M, Mery L, et al. Global cancer observatory:  
666 Cancer today (version 1.1) (2024). Lyon, France, <https://gco.iarc.who.int/today>.
- 667 2 .Haybittle J, Blamey R, Elston C, Johnson J, Doyle P, Campbell F, et al. A prognostic index in primary  
668 breast cancer. *British journal of cancer* **45** (1982) 361–366.
- 669 3 .Phung MT, Tin Tin S, Elwood JM. Prognostic models for breast cancer: a systematic review. *BMC*  
670 *cancer* **19** (2019) 1–18.
- 671 4 .Zhu Z, Li L, Ye Z, Fu T, Du Y, Shi A, et al. Prognostic value of routine laboratory variables in prediction  
672 of breast cancer recurrence. *Scientific Reports* **7** (2017). doi:10.1038/s41598-017-08240-2.

- 673 5 .Rabinovici-Cohen S, Fernández XM, Grandal Rejo B, Hexter E, Hijano Cubelos O, Pajula J, et al.  
674 Multimodal Prediction of Five-Year Breast Cancer Recurrence in Women Who Receive Neoadjuvant  
675 Chemotherapy. *Cancers* **14** (2022) 3848. doi:10.3390/cancers14163848.
- 676 6 .Han J, Hua H, Fei J, Liu J, Guo Y, Ma W, et al. Prediction of disease-free survival in breast cancer  
677 using deep learning with ultrasound and mammography: A multicenter study. *Clinical Breast Cancer*  
678 (2024). doi:10.1016/j.clbc.2024.01.005.
- 679 7 .Yao Y, Lv Y, Tong L, Liang Y, Xi S, Ji B, et al. Icsda: a multi-modal deep learning model to predict  
680 breast cancer recurrence and metastasis risk by integrating pathological, clinical and gene expression  
681 data. *Briefings in Bioinformatics* **23** (2022). doi:10.1093/bib/bbac448.
- 682 8 .Zeng Z, Yao L, Roy A, Li X, Espino S, Clare SE, et al. Identifying breast cancer distant recurrences  
683 from electronic health records using machine learning. *Journal of Healthcare Informatics Research* **3**  
684 (2019) 283–299. doi:10.1007/s41666-019-00046-3.
- 685 9 .González-Castro L, Chávez M, Duflot P, Bleret V, Martin AG, Zobel M, et al. Machine learning  
686 algorithms to predict breast cancer recurrence using structured and unstructured sources from electronic  
687 health records. *Cancers* **15** (2023) 2741. doi:10.3390/cancers15102741.
- 688 10 .Devlin J, Chang MW, Lee K, Toutanova K. BERT: Pre-training of Deep Bidirectional Transformers for  
689 Language Understanding. *Proceedings of the 2019 Conference of the North American Chapter of the*  
690 *Association for Computational Linguistics: Human Language Technologies, Volume 1 (Long and Short*  
691 *Papers)* (Minneapolis, Minnesota: Association for Computational Linguistics) (2019), 4171–4186.  
692 doi:10.18653/v1/N19-1423.
- 693 11 .Li Y, Rao S, Solares JRA, Hassaine A, Ramakrishnan R, Canoy D, et al. BEHRT: Transformer for  
694 Electronic Health Records. *Scientific Reports* **10** (2020) 7155. doi:10.1038/s41598-020-62922-y.  
695 Number: 1 Publisher: Nature Publishing Group.
- 696 12 .Pang C, Jiang X, Kalluri KS, Spotnitz M, Chen R, Perotte A, et al. Cehr-bert: Incorporating temporal  
697 information from structured ehr data to improve prediction tasks. Roy S, Pfohl S, Rocheteau E, Tadesse  
698 GA, Oala L, Falck F, et al., editors, *Proceedings of Machine Learning for Health* (PMLR) (2021),  
699 *Proceedings of Machine Learning Research*, vol. 158, 239–260.
- 700 13 .Rasmy L, Xiang Y, Xie Z, Tao C, Zhi D. Med-bert: pretrained contextualized embeddings on large-  
701 scale structured electronic health records for disease prediction. *npj Digital Medicine* **4** (2021) 86.  
702 doi:10.1038/s41746-021-00455-y.
- 703 14 .Rao S, Mamouei M, Salimi-Khorshidi G, Li Y, Ramakrishnan R, Hassaine A, et al. Targeted-BEHRT:  
704 Deep Learning for Observational Causal Inference on Longitudinal Electronic Health Records. *IEEE*  
705 *Transactions on Neural Networks and Learning Systems* (2022) 1–12. doi:10.1109/TNNLS.2022.  
706 3183864. Conference Name: IEEE Transactions on Neural Networks and Learning Systems.
- 707 15 .Li Y, Mamouei M, Salimi-Khorshidi G, Rao S, Hassaine A, Canoy D, et al. Hi-BEHRT: Hierarchical  
708 Transformer-Based Model for Accurate Prediction of Clinical Events Using Multimodal Longitudinal  
709 Electronic Health Records. *IEEE Journal of Biomedical and Health Informatics* **27** (2023) 1106–  
710 1117. doi:10.1109/JBHI.2022.3224727. Conference Name: IEEE Journal of Biomedical and Health  
711 Informatics.
- 712 16 .Blamey R, Ellis I, Pinder S, Lee A, Macmillan R, Morgan D, et al. Survival of invasive breast cancer  
713 according to the nottingham prognostic index in cases diagnosed in 1990–1999. *European journal of*  
714 *cancer* **43** (2007) 1548–1555.
- 715 17 .Grossman Liu L, Grossman RH, Mitchell EG, Weng C, Natarajan K, Hripcsak G, et al. A deep database  
716 of medical abbreviations and acronyms for natural language processing. *Scientific Data* **8** (2021).  
717 doi:10.1038/s41597-021-00929-4.

- 718 **18** .Vaswani A, Shazeer N, Parmar N, Uszkoreit J, Jones L, Gomez AN, et al. Attention is All you Need.  
719 Guyon I, Luxburg UV, Bengio S, Wallach H, Fergus R, Vishwanathan S, et al., editors, *Advances in*  
720 *Neural Information Processing Systems 30* (Curran Associates, Inc.) (2017), 5998–6008.
- 721 **19** .Chen CFR, Fan Q, Panda R. Crossvit: Cross-attention multi-scale vision transformer for image  
722 classification. *Proceedings of the IEEE/CVF international conference on computer vision* (2021),  
723 357–366.
- 724 **20** .Gao S, Alawad M, Young MT, Gounley J, Schaefferkoetter N, Yoon HJ, et al. Limitations of  
725 transformers on clinical text classification. *IEEE Journal of Biomedical and Health Informatics*  
726 **25** (2021) 3596–3607.
- 727 **21** .Park H, Vyas Y, Shah K. Efficient classification of long documents using transformers. Muresan  
728 S, Nakov P, Villavicencio A, editors, *Proceedings of the 60th Annual Meeting of the Association*  
729 *for Computational Linguistics (Volume 2: Short Papers)* (Association for Computational Linguistics)  
730 (2022), 702–709.
- 731 **22** .Zaheer M, Guruganesh G, Dubey KA, Ainslie J, Alberti C, Ontanon S, et al. Big bird: Transformers for  
732 longer sequences. *Advances in neural information processing systems* (2020), vol. 33, 17283–17297.
- 733 **23** .Xiong Y, Zeng Z, Chakraborty R, Tan M, Fung G, Li Y, et al. Nyströmformer: A nyström-based  
734 algorithm for approximating self-attention. *Proceedings of the AAAI Conference on Artificial*  
735 *Intelligence* (2021), vol. 35, 14138–14148.
- 736 **24** .Pappagari R, Zelasko P, Villalba J, Carmiel Y, Dehak N. Hierarchical transformers for long document  
737 classification. *2019 IEEE Automatic Speech Recognition and Understanding Workshop (ASRU)* (2019),  
738 838–844.
- 739 **25** .Li C, Yates A, MacAvaney S, He B, Sun Y. PARADE: Passage representation aggregation for document  
740 reranking. *ACM Transactions on Information Systems* **42** (2023) 1–26.
- 741 **26** .Labrak Y, Bazoge A, Dufour R, Rouvier M, Morin E, Daille B, et al. DrBERT: A Robust Pre-trained  
742 Model in French for Biomedical and Clinical domains. *Proceedings of the 61th Annual Meeting of the*  
743 *Association for Computational Linguistics (ACL'23), Long Paper* (Toronto, Canada: Association for  
744 Computational Linguistics) (2023), 16207–16221.
- 745 **27** .Liu Y, Ott M, Goyal N, Du J, Joshi M, Chen D, et al. Roberta: A robustly optimized bert pretraining  
746 approach. *arXiv preprint arXiv:1907.11692* (2019).
- 747 **28** .Bergstra J, Yamins D, Cox DD. Hyperopt: A python library for optimizing the hyperparameters of  
748 machine learning algorithms. van der Walt S, Millman J, Huff K, editors, *Proceedings of the 12th*  
749 *Python in Science Conference* (2013), 13 – 19. doi:10.25080/Majora-8b375195-003.
- 750 **29** .Pedregosa F, Varoquaux G, Gramfort A, Michel V, Thirion B, Grisel O, et al. Scikit-learn: Machine  
751 learning in Python. *Journal of Machine Learning Research* **12** (2011) 2825–2830.
- 752 **30** .Honnibal M, Montani I, Van Landeghem S, Boyd A. spaCy: Industrial-strength natural language  
753 processing in python (2020). Doi:10.5281/zenodo.1212303, <https://spacy.io/>.
- 754 **31** .Paszke A, Gross S, Massa F, Lerer A, Bradbury J, Chanan G, et al. Pytorch: An imperative style,  
755 high-performance deep learning library. Wallach H, Larochelle H, Beygelzimer A, d'Alché-Buc F, Fox  
756 E, Garnett R, editors, *Advances in Neural Information Processing Systems 32* (Curran Associates, Inc.)  
757 (2019), 8024–8035.
- 758 **32** .[Dataset] Kokhlikyan N, Miglani V, Martin M, Wang E, Alsallakh B, Reynolds J, et al. Captum: A  
759 unified and generic model interpretability library for pytorch (2020).
- 760 **33** .Sundararajan M, Taly A, Yan Q. Axiomatic attribution for deep networks. *Proceedings of the 34th*  
761 *International Conference on Machine Learning - Volume 70* (JMLR.org) (2017), ICML'17, 3319–3328.

- 762 **34**.Radisky DC, Hartmann LC. Mammary involution and breast cancer risk: transgenic models and clinical  
763 studies. *Journal of mammary gland biology and neoplasia* **14** (2009) 181–191.
- 764 **35**.Bodelon C, Oh H, Derkach A, Sampson JN, Sprague BL, Vacek P, et al. Polygenic risk score for the  
765 prediction of breast cancer is related to lesser terminal duct lobular unit involution of the breast. *NPJ*  
766 *breast cancer* **6** (2020) 41.
- 767 **36**.Kelley K, Sener SF. Who still needs surgical staging of the axilla for invasive breast cancer? *Journal of*  
768 *Surgical Oncology* (2024). doi:10.1002/jso.27753.
- 769 **37**.Piccart MJ, Klijn J, Paridaens R, Nooij M, Mauriac L, Coleman R, et al. Corticosteroids significantly  
770 delay the onset of docetaxel-induced fluid retention: final results of a randomized study of the european  
771 organization for research and treatment of cancer investigational drug branch for breast cancer. *Journal*  
772 *of Clinical Oncology* **15** (1997) 3149–3155. doi:10.1200/jco.1997.15.9.3149.
- 773 **38**.Mosarla RC, Vaduganathan M, Qamar A, Moslehi J, Piazza G, Giugliano RP. Anticoagulation  
774 strategies in patients with cancer. *Journal of the American College of Cardiology* **73** (2019) 1336–1349.  
775 doi:10.1016/j.jacc.2019.01.017.
- 776 **39**.Witteveen A, Vliegen IMH, Sonke GS, Klaase JM, IJzerman MJ, Siesling S. Personalisation of  
777 breast cancer follow-up: a time-dependent prognostic nomogram for the estimation of annual risk of  
778 locoregional recurrence in early breast cancer patients. *Breast Cancer Research and Treatment* **152**  
779 (2015) 627–636. doi:10.1007/s10549-015-3490-4.
- 780 **40**.Ignatov A, Eggemann H, Burger E, Ignatov T. Patterns of breast cancer relapse in accordance to  
781 biological subtype. *Journal of Cancer Research and Clinical Oncology* **144** (2018) 1347–1355.
- 782 **41**.Kim JY, Lee YS, Yu J, Park Y, Lee SK, Lee M, et al. Deep learning-based prediction model for breast  
783 cancer recurrence using adjuvant breast cancer cohort in tertiary cancer center registry. *Frontiers in*  
784 *Oncology* **11** (2021). doi:10.3389/fonc.2021.596364.
- 785 **42**.Dai W, Li Y, Mo S, Feng Y, Zhang L, Xu Y, et al. A robust gene signature for the prediction  
786 of early relapse in stage i–iii colon cancer. *Molecular Oncology* **12** (2018) 463–475. doi:https:  
787 //doi.org/10.1002/1878-0261.12175.
- 788 **43**.McLaughlin R, McGrath J, Grimes H, Given H. The prognostic value of the tumor marker ca 15–3 at  
789 initial diagnosis of patients with breast cancer. *The International Journal of Biological Markers* **15**  
790 (2000) 340–342. doi:10.1177/172460080001500412.
- 791 **44**.Chourin S, Georgescu D, Gray C, Guillemet C, Loeb A, Veyret C, et al. Value of ca 15-3 determination  
792 in the initial management of breast cancer patients. *Annals of Oncology* **20** (2009) 962–964. doi:10.  
793 1093/annonc/mdp061.
- 794 **45**.De Cock L, Heylen J, Wildiers A, Punie K, Smeets A, Weltens C, et al. Detection of secondary  
795 metastatic breast cancer by measurement of plasma ca 15.3. *ESMO Open* **6** (2021) 100203. doi:10.  
796 1016/j.esmoop.2021.100203.
- 797 **46**.Nemoto T, Vana J, Bedwani RN, Baker HW, McGregor FH, Murphy GP. Management and survival  
798 of female breast cancer: results of a national survey by the american college of surgeons. *Cancer* **45**  
799 (1980) 2917–2924.
- 800 **47**.D’Costa A, Denkovski S, Malyska M, Moon SY, Rufino B, Yang Z, et al. Multiple sclerosis severity  
801 classification from clinical text. *Proceedings of the 3rd Clinical Natural Language Processing Workshop*  
802 (2020), 7–23.
- 803 **48**.Hui Y, Du L, Lin S, Qu Y, Cao D. Extraction and classification of tcm medical records based on bert  
804 and bi-lstm with attention mechanism. *2020 IEEE International Conference on Bioinformatics and*  
805 *Biomedicine (BIBM)* (IEEE) (2020), 1626–1631. doi:10.1109/bibm49941.2020.9313359.

# Supplementary Material to Multimodal BEHRT: Transformers for Multimodal Electronical Health Records

## 1 SUPPLEMENTARY TABLES AND FIGURES

| Feature       | Normal range  | Mean value $\pm$ std  | missing |
|---------------|---------------|-----------------------|---------|
| CA15-3 (U/ml) | $N < 30$      | $63.39 \pm 484.44$    | 6 390   |
| LEUK (g/l)    | $4 < N < 10$  | $6.99 \pm 6.82$       | 2 525   |
| PN (g/l)      | $1.7 < N < 7$ | $718.85 \pm 1 789.66$ | 9 419   |
| LYMP (g/l)    | $1.4 < N < 4$ | $289.63 \pm 714.26$   | 9 448   |
| MONO (g/l)    | $0.2 < N < 1$ | $33.29 \pm 123.59$    | 3 675   |

**Table S1.** Normal ranges for the biological features

| Features          |                | Entire dataset        |        | Dataset for DFS at 3 years |       |
|-------------------|----------------|-----------------------|--------|----------------------------|-------|
|                   |                | Mean $\pm$ std        | N      | Mean $\pm$ std             | N     |
| Age               | $< 50$         | $58 \pm 12$           | 3 982  | $56 \pm 12$                | 2 493 |
|                   | $\geq 50$      |                       | 11 168 |                            | 5 596 |
| BC subtype        | Luminal        |                       | 9 979  |                            | 4 866 |
|                   | TNBC           |                       | 1 041  |                            | 642   |
|                   | HER2+/HR+      |                       | 681    |                            | 587   |
|                   | HER2+/HR-      |                       | 480    |                            | 415   |
| Grades            | I              |                       | 3 473  |                            | 1 688 |
|                   | II             |                       | 5 911  |                            | 3 057 |
|                   | III            |                       | 3 119  |                            | 2 044 |
| Nodes             | N0             | $0.93 \pm 2.49$       | 9 463  | $1.07 \pm 2.74$            | 4 899 |
|                   | N+             |                       | 4 045  |                            | 2 405 |
| Tumor size (mm)   | Clinical       | $16.89 \pm 12.70$     |        | $17.36 \pm 12.97$          |       |
|                   | Pathological   | $15.04 \pm 12.75$     |        | $15.63 \pm 12.90$          |       |
| Biological values | CA 15-3 (U/ml) | $63.39 \pm 484.44$    | 8 760  | $62.85 \pm 535.76$         | 3 826 |
|                   | LEUK (g/l)     | $6.99 \pm 6.82$       | 12 625 | $6.90 \pm 7.49$            | 6 419 |
|                   | PN (g/l)       | $718.85 \pm 1 789.66$ | 5 731  | $976.17 \pm 2 007.52$      | 2 385 |
|                   | LYMP (g/l)     | $289.63 \pm 714.26$   | 5 702  | $405.84 \pm 820.08$        | 2 373 |
|                   | MONO (g/l)     | $33.29 \pm 123.59$    | 11 475 | $37.54 \pm 131.79$         | 5 821 |
| Medical reports   | visits         | $46 \pm 33$           |        | $25 \pm 10$                |       |
|                   | reports        | $62 \pm 50$           |        | $34 \pm 15$                |       |
|                   | words/report   | $172 \pm 41$          |        | $159 \pm 37$               |       |

**Table S2.** Descriptive statistics of the data used in this study, for the full cohort of 15 150 patients, as well as the data set of patients uncensored 3 years after surgery.

Multimodal BEHRT Supplementary Material

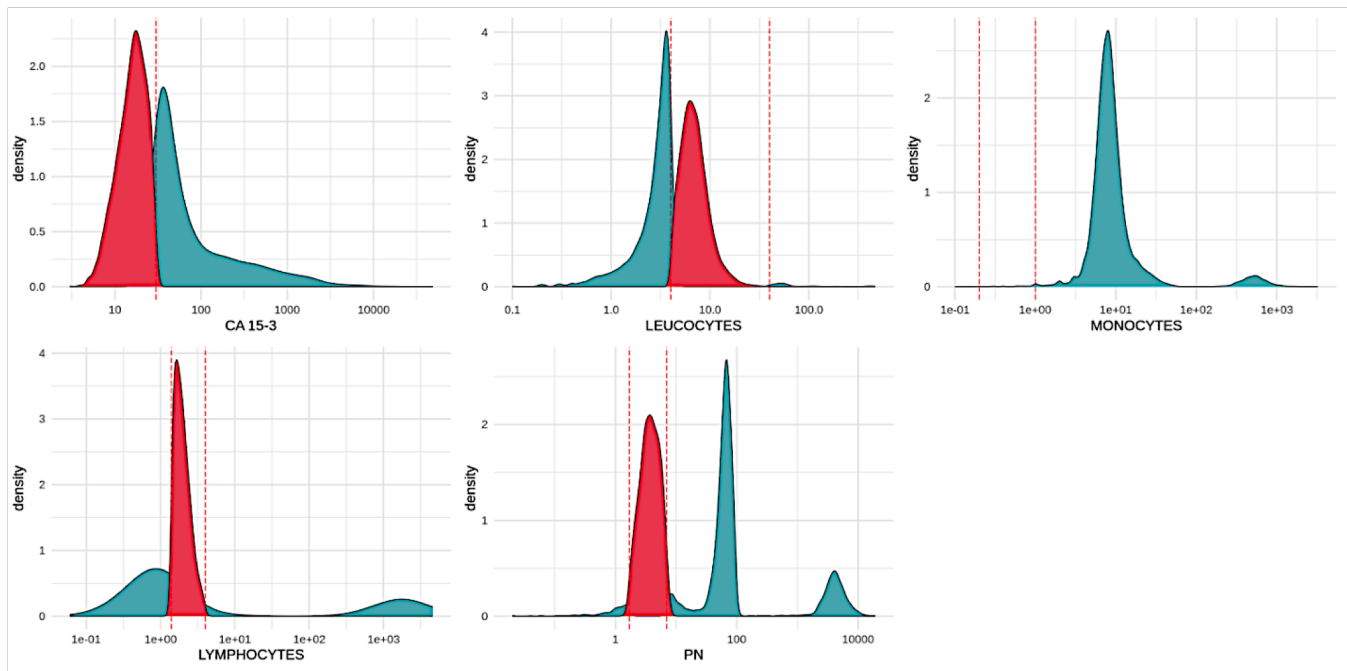

**Figure S1.** Binarization of biological features into two values, 1 and 2. For each of the 5 biological features, the dashed red lines delineate the normal range, highlighted in red, and mapped to 2, from the abnormal range, highlighted in green, and mapped to 1

|                   |                                      |
|-------------------|--------------------------------------|
| Therapies         | Sub-therapies                        |
| Surgery           | Lumpectomy                           |
|                   | Mastectomy                           |
|                   | Axillary node dissection             |
|                   | Sentinel node biopsy                 |
| Radiotherapy      | Axillary irradiation                 |
|                   | Internal mammary chain irradiation   |
|                   | Mammary gland/chest wall irradiation |
| Hormone therapy   | Supra/sub-clavicular irradiation     |
|                   | Tamoxifen                            |
|                   | Aromatase                            |
| Anti-HER2 therapy | LHRH agonist                         |
|                   | Trastuzumab                          |
|                   | Pertuzumab                           |
|                   | Lapatinib                            |

**Table S3.** List of possible therapies and sub-therapies in our data.

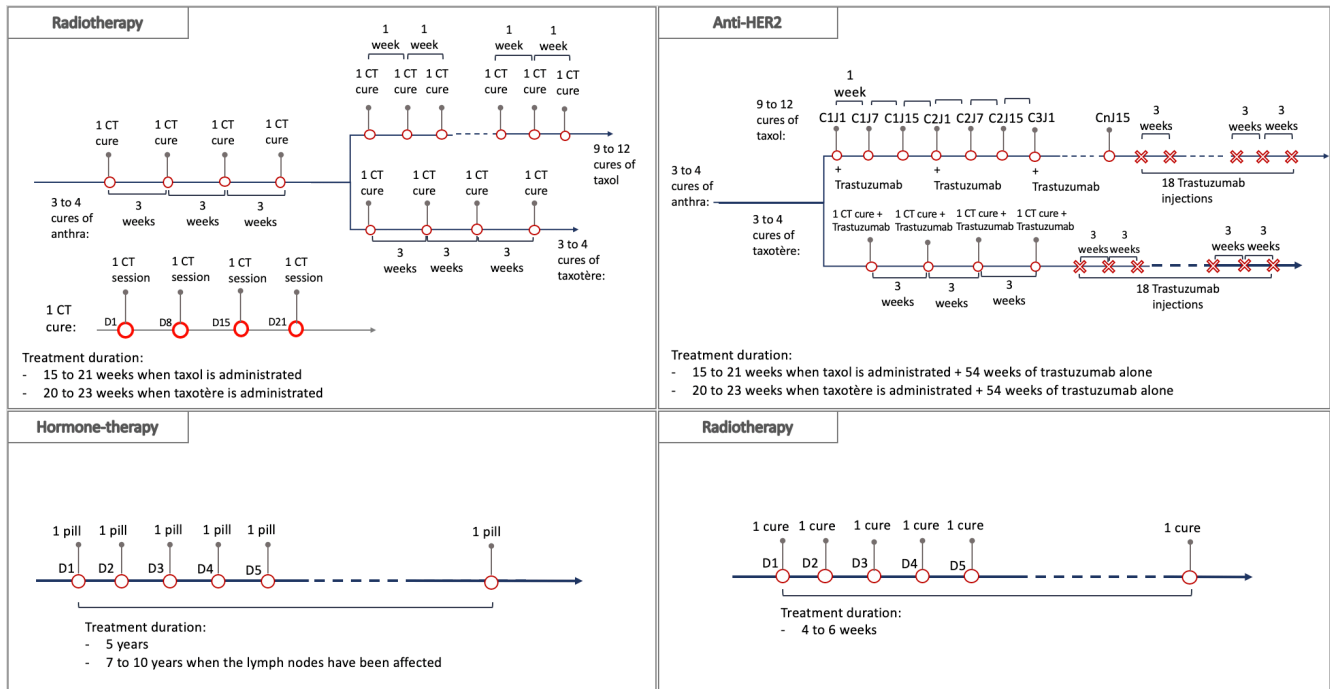

Figure S2. Institut Curie Therapeutic Protocol

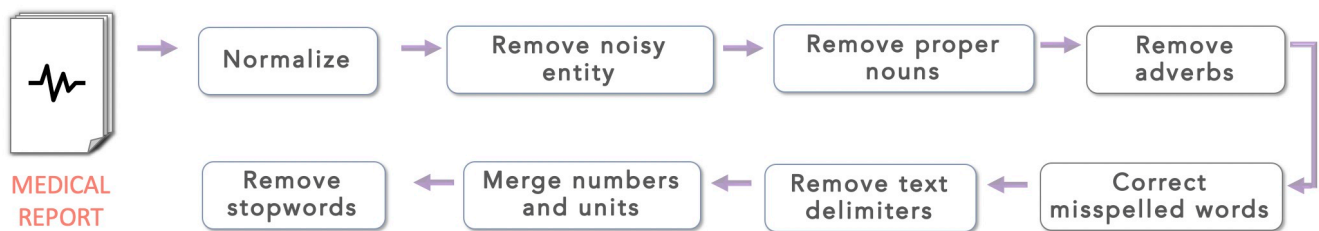

Figure S3. Text preprocessing pipeline.



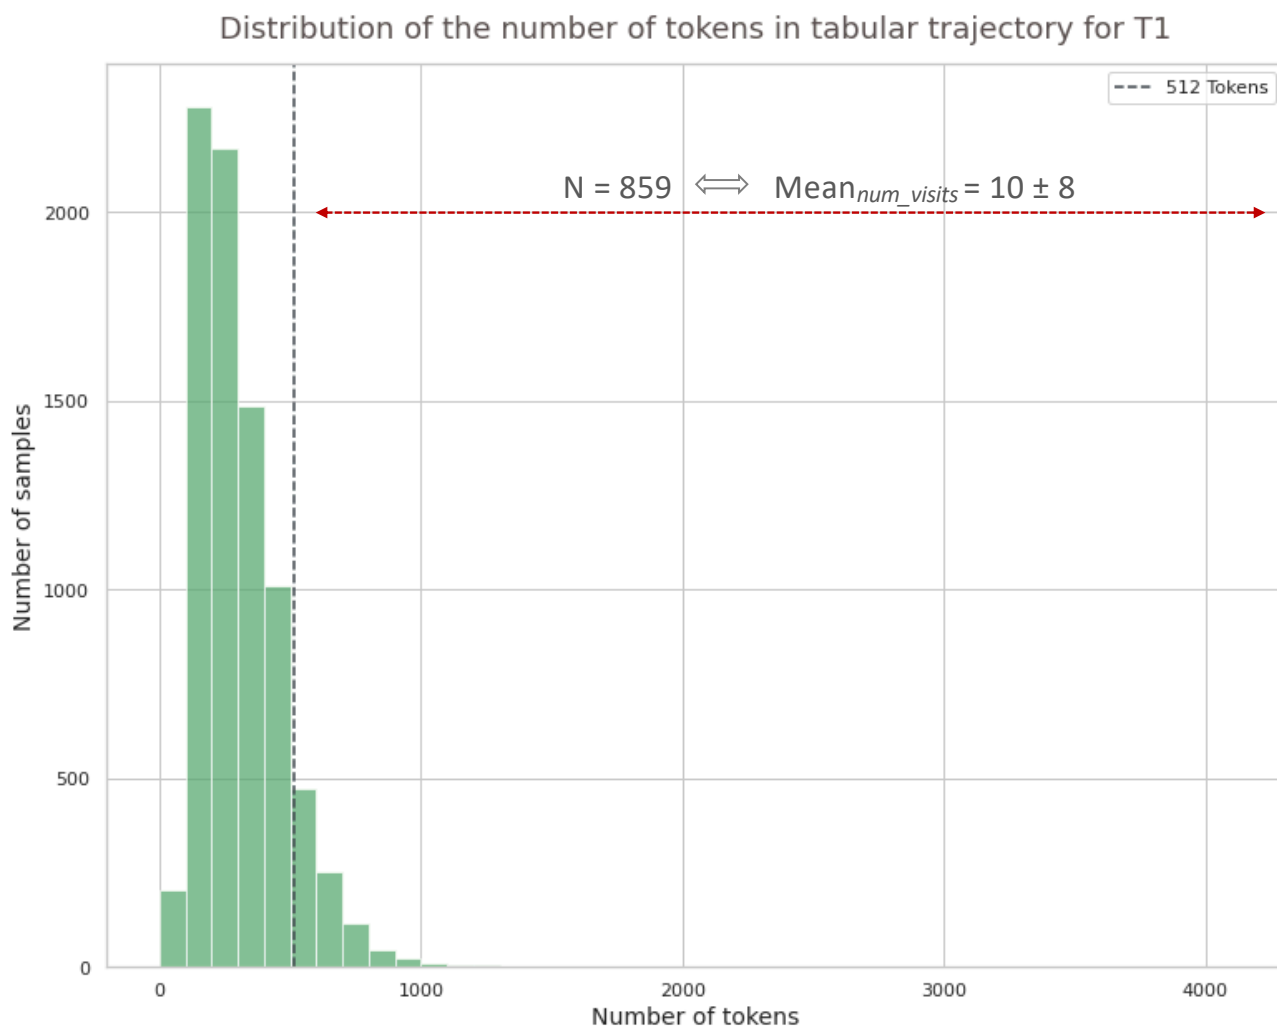

**Figure S4.** Distribution of the number of tokens per patient trajectory, for the prediction of disease-free survival 3 years after surgery. 859 samples exceed the maximum sequence length for Tabular BEHRT (512 tokens). This represents an average of 10 visits per patient that are not considered by Tabular BEHRT.

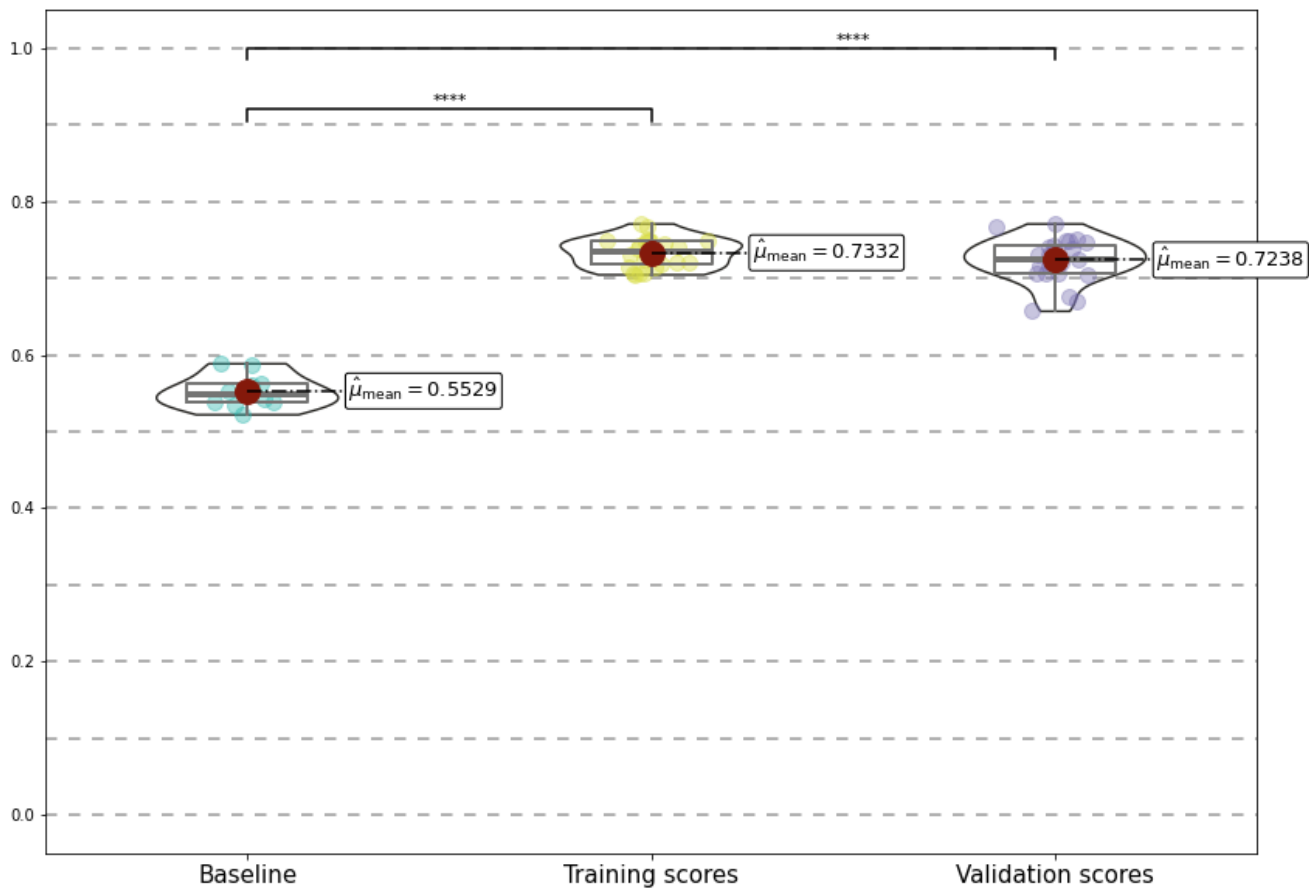

**Figure S5.** Precision scores for the Masked Language Model (pre-training of Tabular BEHRT). The baseline scores are obtained from the MLM ran on shuffled sequences.

Multimodal BEHRT Supplementary Material

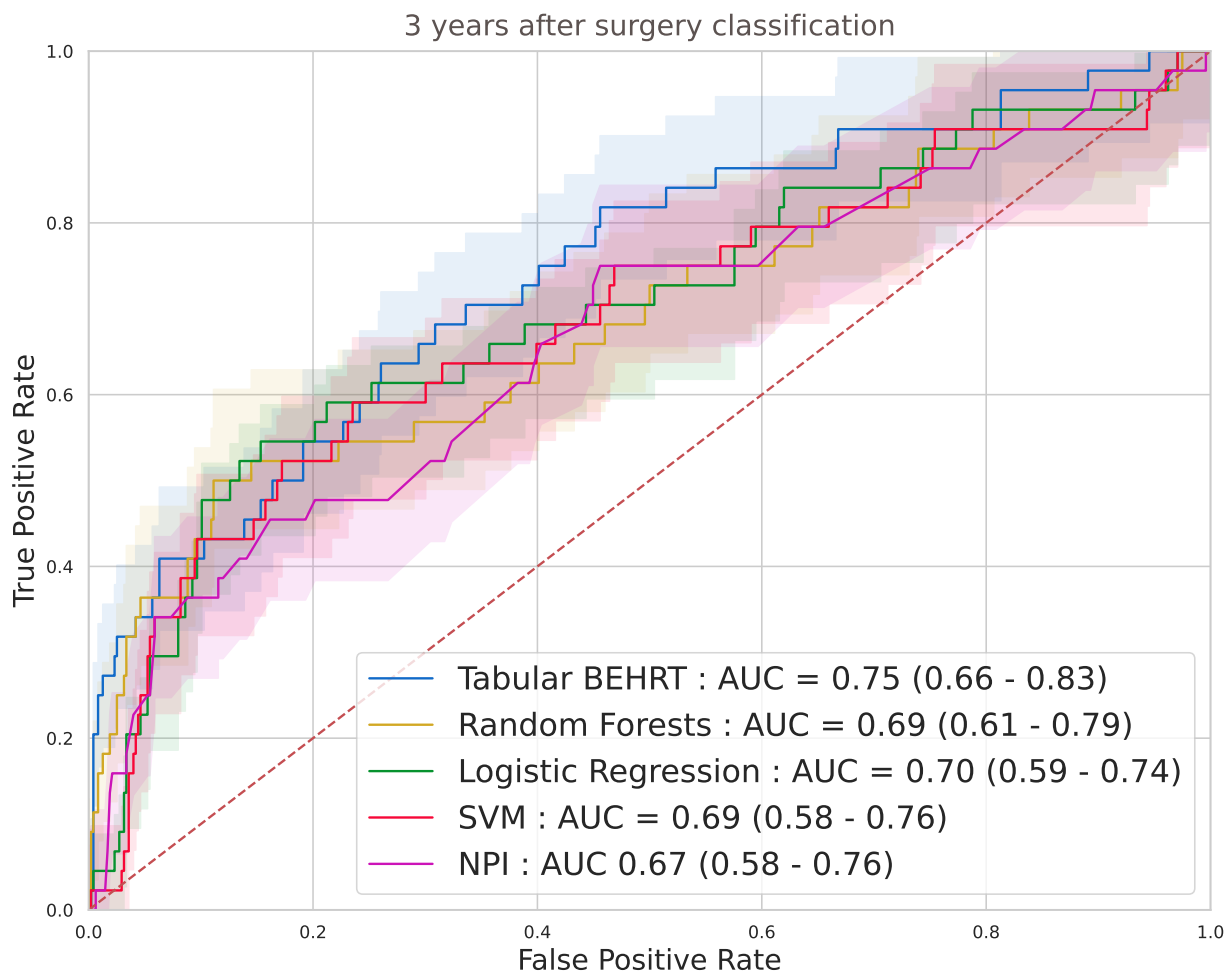

**Figure S6.** ROC curves for baselines and Tabular BEHRT, for predicting disease-free survival 3 years after surgery.

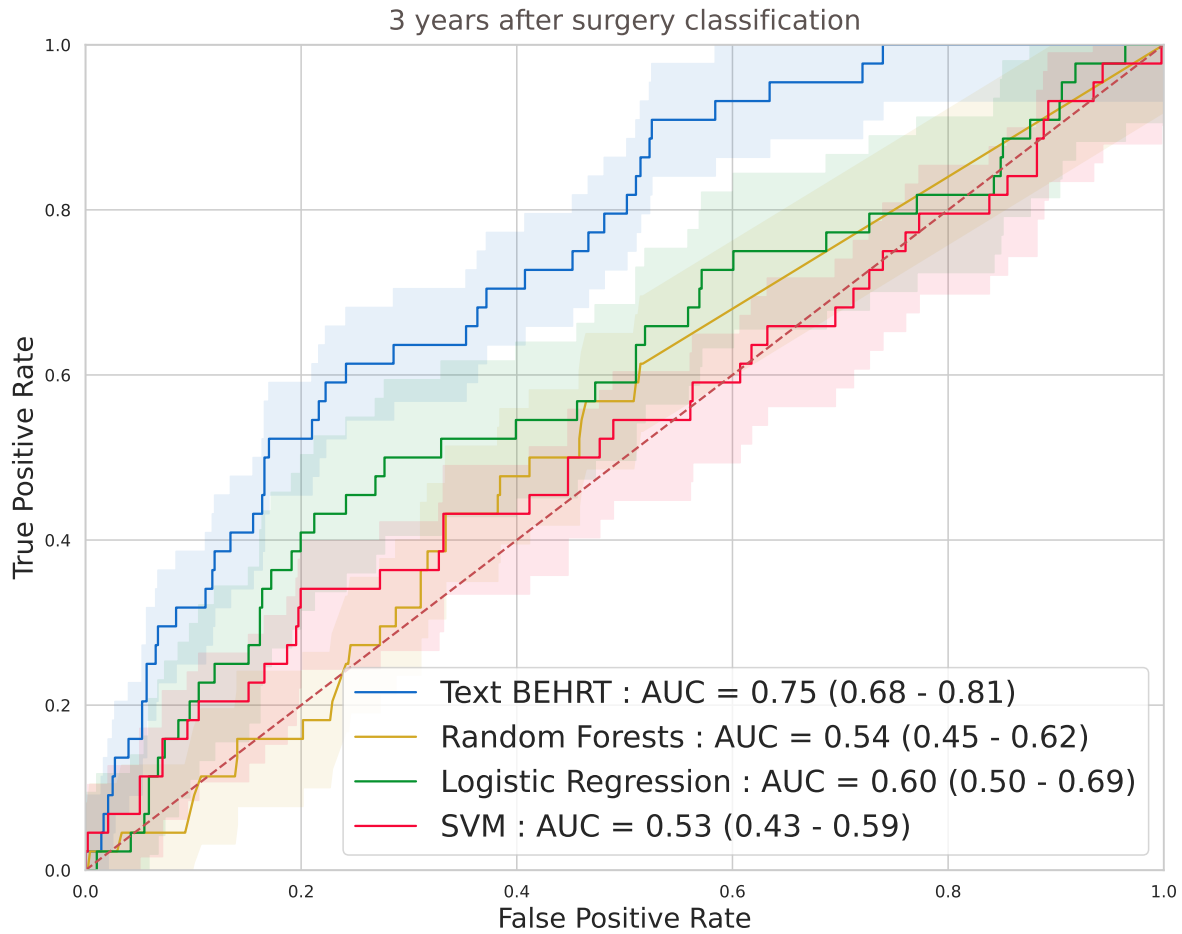

**Figure S7.** ROC curves for baselines and Text BEHRT, for predicting disease-free survival 3 years after surgery.

Multimodal BEHRT Supplementary Material

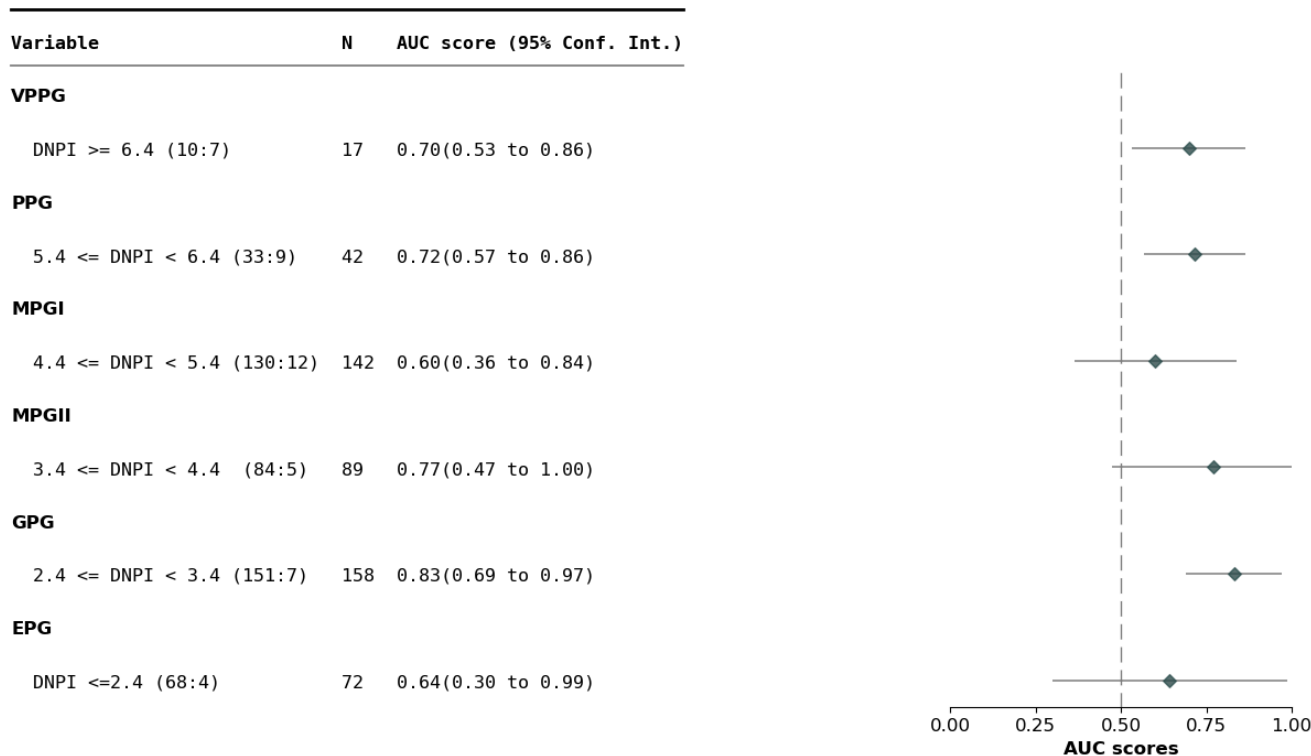

**Figure S8.** AUC-ROC of M-BEHRT stratified by NPI, for predicting disease-free survival 3 years after surgery.

| Features          | Entire dataset |                  | Dataset for DFS at 3 years |       | Dataset for DFS at 5 years |       |
|-------------------|----------------|------------------|----------------------------|-------|----------------------------|-------|
|                   | Mean ± std     | N                | Mean ± std                 | N     | Mean ± std                 | N     |
| Age               | < 50           | 3 982            | 56 ± 12                    | 2 493 | 55 ± 13                    | 1 725 |
|                   | ≥ 50           | 11 168           |                            | 5 596 |                            | 3 467 |
| BC subtype        | Luminal        | 9 979            |                            | 4 866 |                            | 2 930 |
|                   | TNBC           | 1 041            |                            | 642   |                            | 446   |
|                   | HER2+/HR+      | 681              |                            | 587   |                            | 482   |
|                   | HER2+/HR-      | 480              |                            | 415   |                            | 330   |
| Grades            | I              | 3 473            |                            | 1 688 |                            | 1 016 |
|                   | II             | 5 911            |                            | 3 057 |                            | 1 941 |
|                   | III            | 3 119            |                            | 2 044 |                            | 1 462 |
| Nodes             | N0             | 9 463            | 1.07 ± 2.74                | 4 899 | 1.18 ± 3.01                | 3 132 |
|                   | N+             | 4 045            |                            | 2 405 |                            | 1 597 |
| Tumor size (mm)   | Clinical       | 16.89 ± 12.70    | 17.36 ± 12.97              |       | 17.78 ± 13.18              |       |
|                   | Pathological   | 15.04 ± 12.75    | 15.63 ± 12.90              |       | 16.17 ± 12.94              |       |
| Biological values | CA 15-3 (U/ml) | 63.39 ± 484.44   | 62.85 ± 535.76             | 3 826 | 75.34 ± 617.09             | 2 256 |
|                   | LEUK (g/l)     | 6.99 ± 6.82      | 6.90 ± 7.49                | 6 419 | 6.75 ± 3.60                | 3 916 |
|                   | PN (g/l)       | 718.85 ± 1789.66 | 976.17 ± 2007.52           | 2 385 | 1105.76 ± 2093.81          | 1 365 |
|                   | LYMP (g/l)     | 289.63 ± 714.26  | 405.84 ± 820.08            | 2 373 | 463.92 ± 862.37            | 1 375 |
|                   | MONO (g/l)     | 33.29 ± 123.59   | 37.54 ± 131.79             | 5 821 | 33.29 ± 123.59             | 3 489 |
| Medical reports   | visits         | 46 ± 33          | 25 ± 10                    |       | 25 ± 10                    |       |
|                   | reports        | 62 ± 50          | 34 ± 15                    |       | 34 ± 15                    |       |
|                   | words/report   | 172 ± 41         | 159 ± 37                   |       | 159 ± 37                   |       |

**Table S4.** Descriptive statistics of the data sets used in this study, for the full cohort of 15 150 patients, as well as the data set of patients uncensored 3 years and 5 years after surgery.

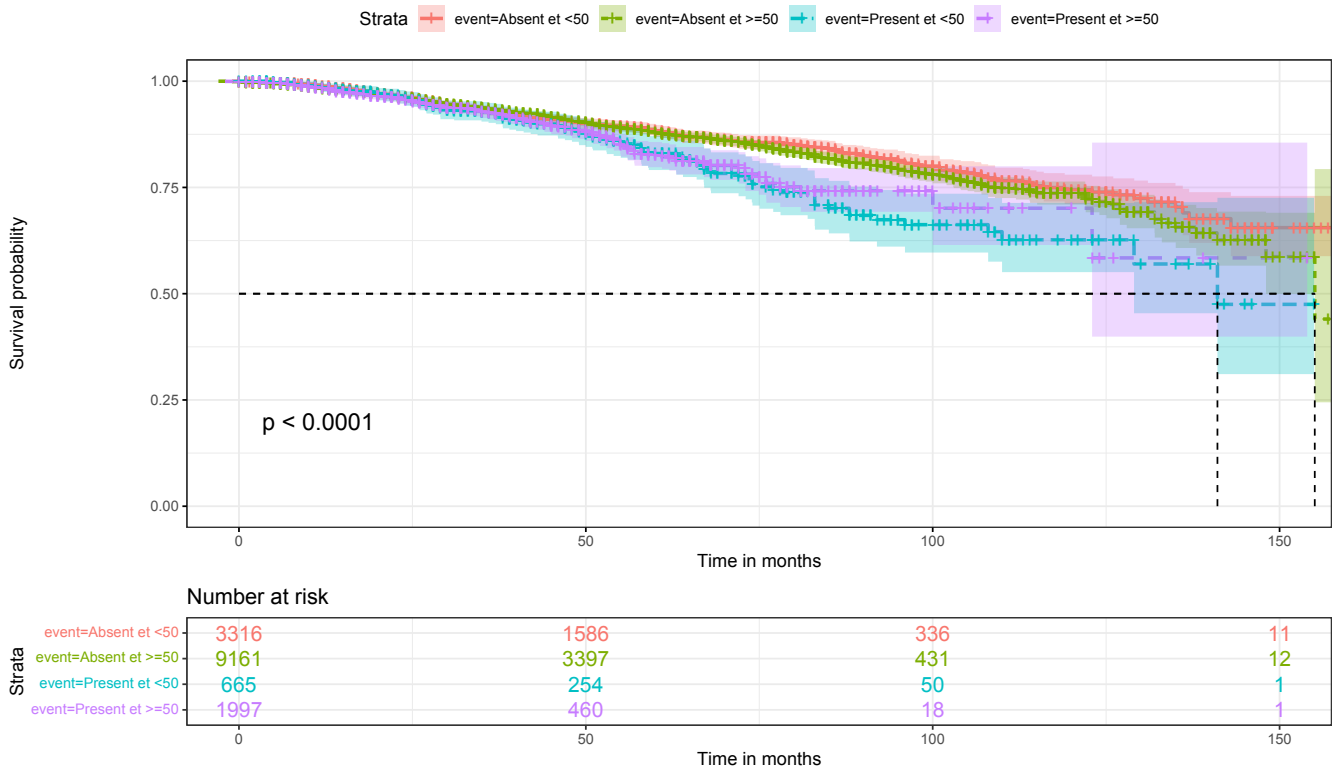

**Figure S9.** Survival plots for the presence/absence of the sentence meaning “breast in partial involution with less than 50% glandular tissue”, combined with the feature “age” (> 50 vs < 50).

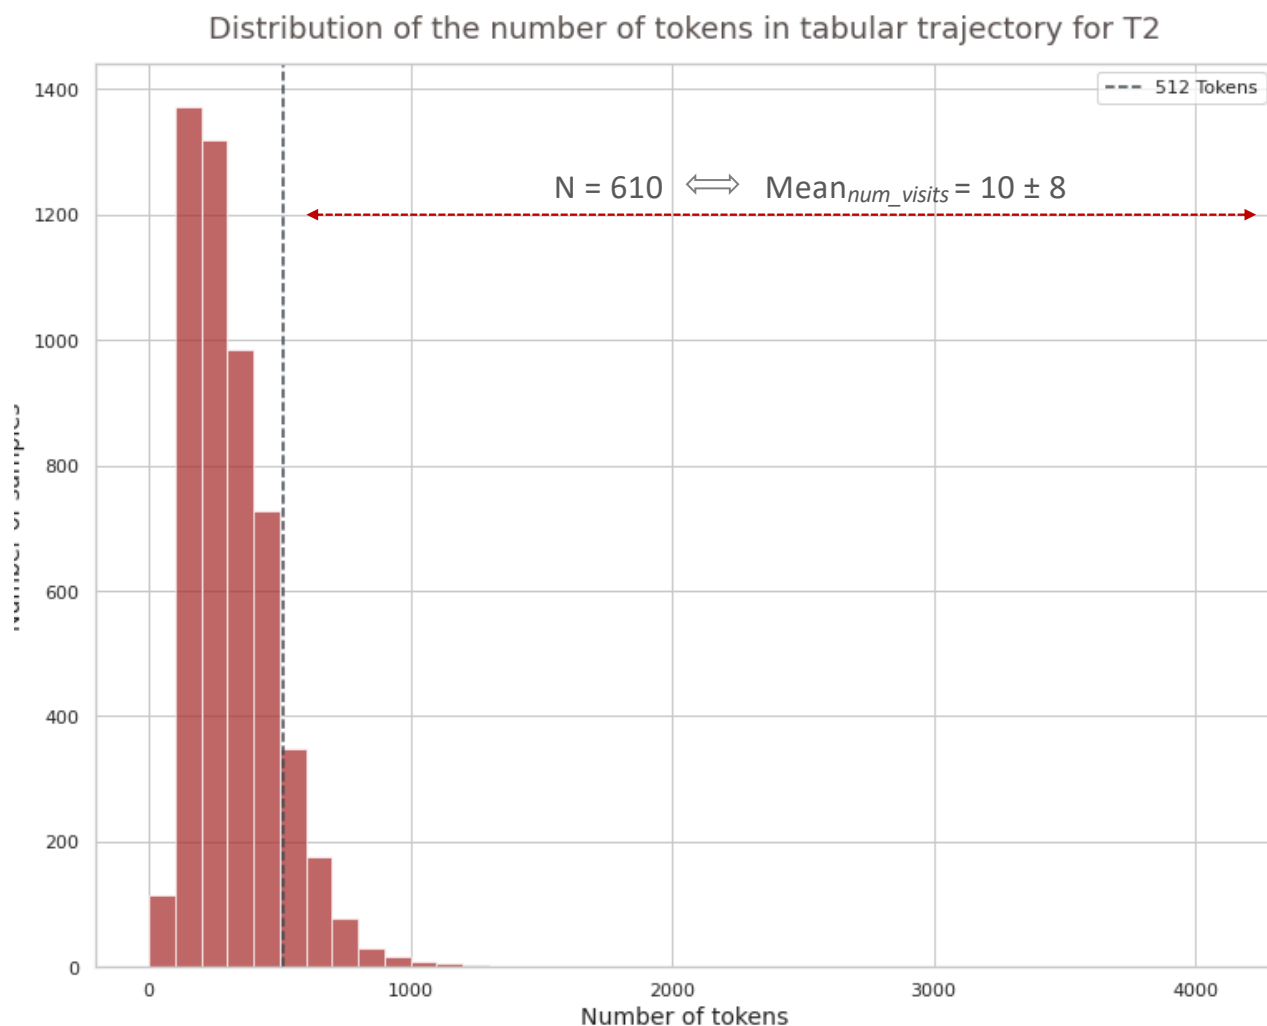

**Figure S10.** Distribution of the number of tokens per patient trajectory, for the prediction of disease-free survival 5 years after surgery. 610 samples exceed the maximum sequence length for Tabular BEHRT (512 tokens). This represents an average of 10 visits per patient that are not considered by Tabular BEHRT.

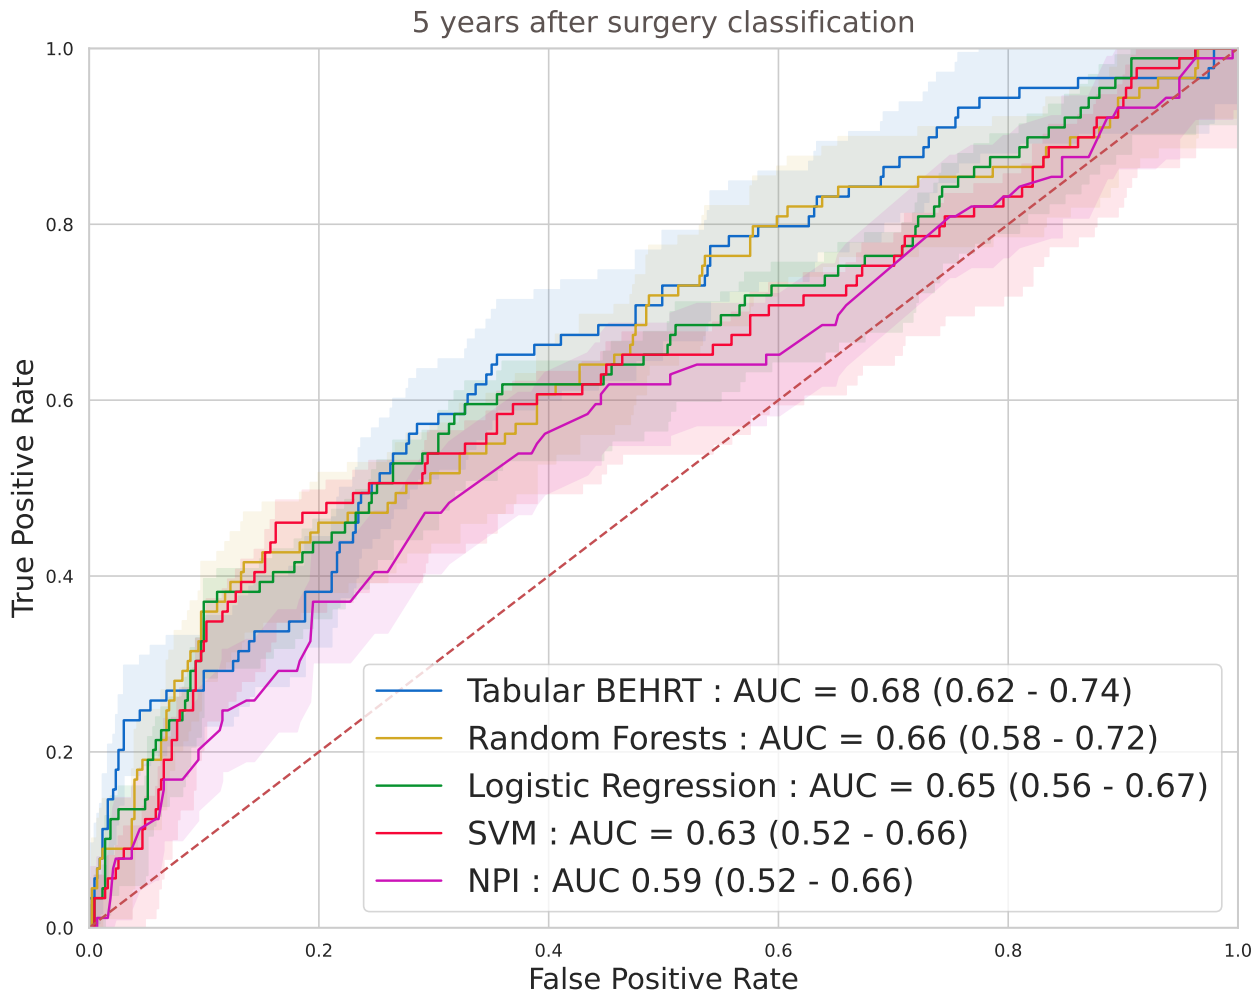

**Figure S11.** ROC curves for baselines and Tabular BEHRT, for predicting disease-free survival 5 years after surgery.



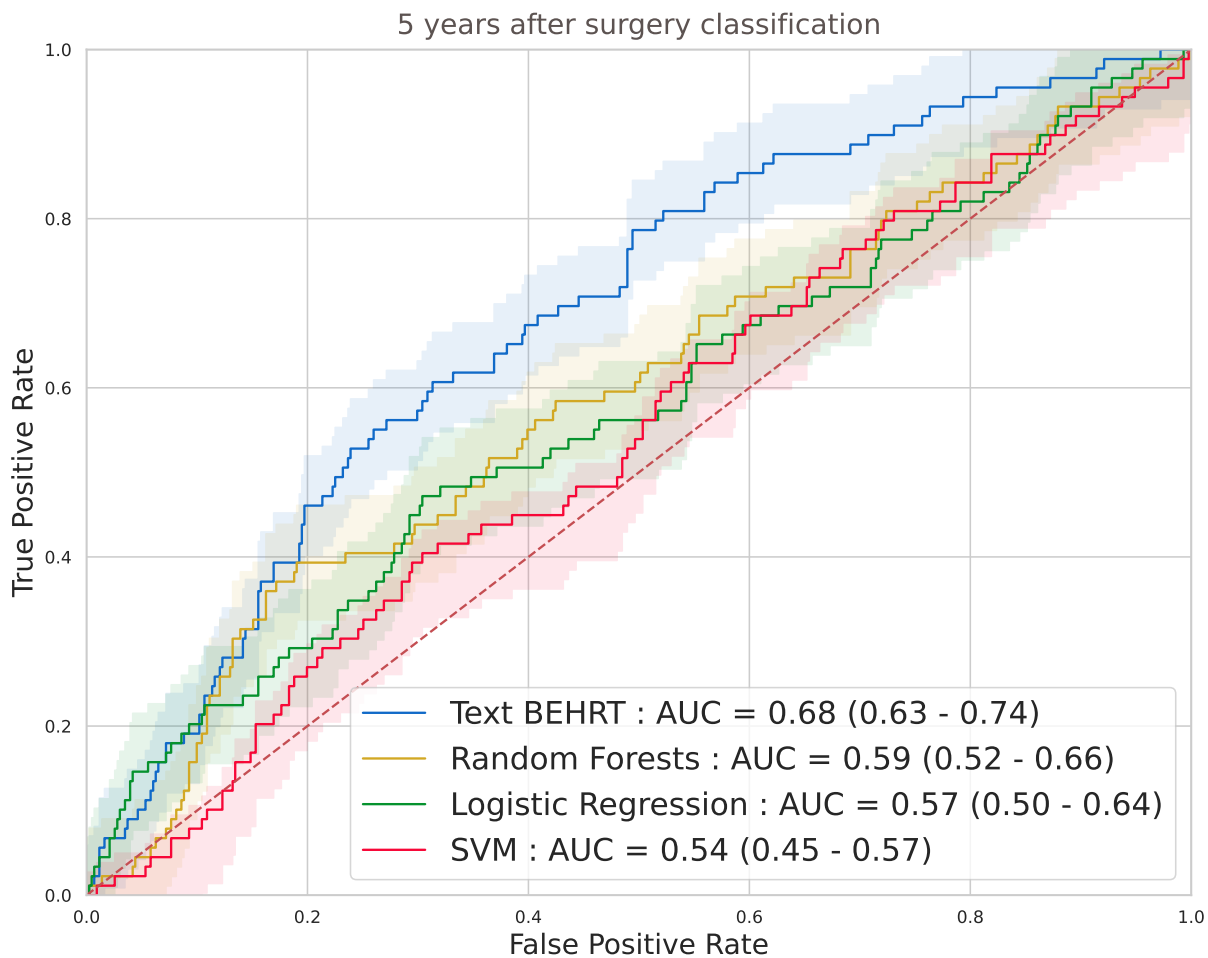

**Figure S12.** ROC curves for baselines and Text BEHRT, for predicting disease-free survival 5 years after surgery.

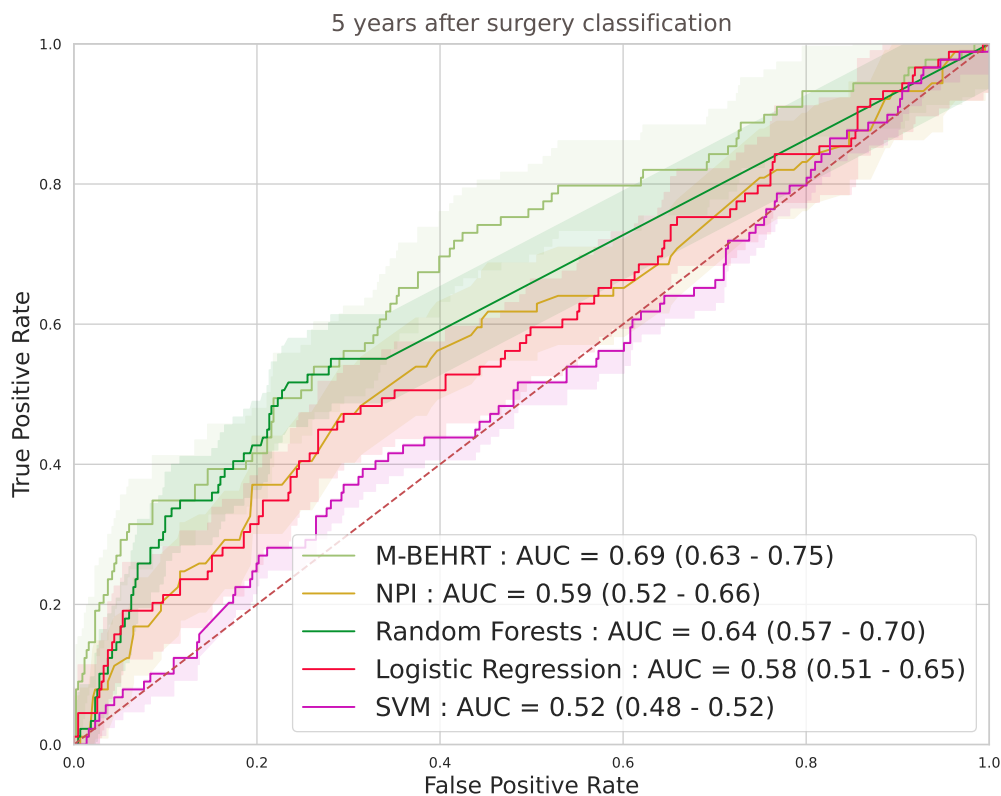

**Figure S13.** ROC curves M-BEHRT and baselines, for predicting disease-free survival 5 years after surgery.

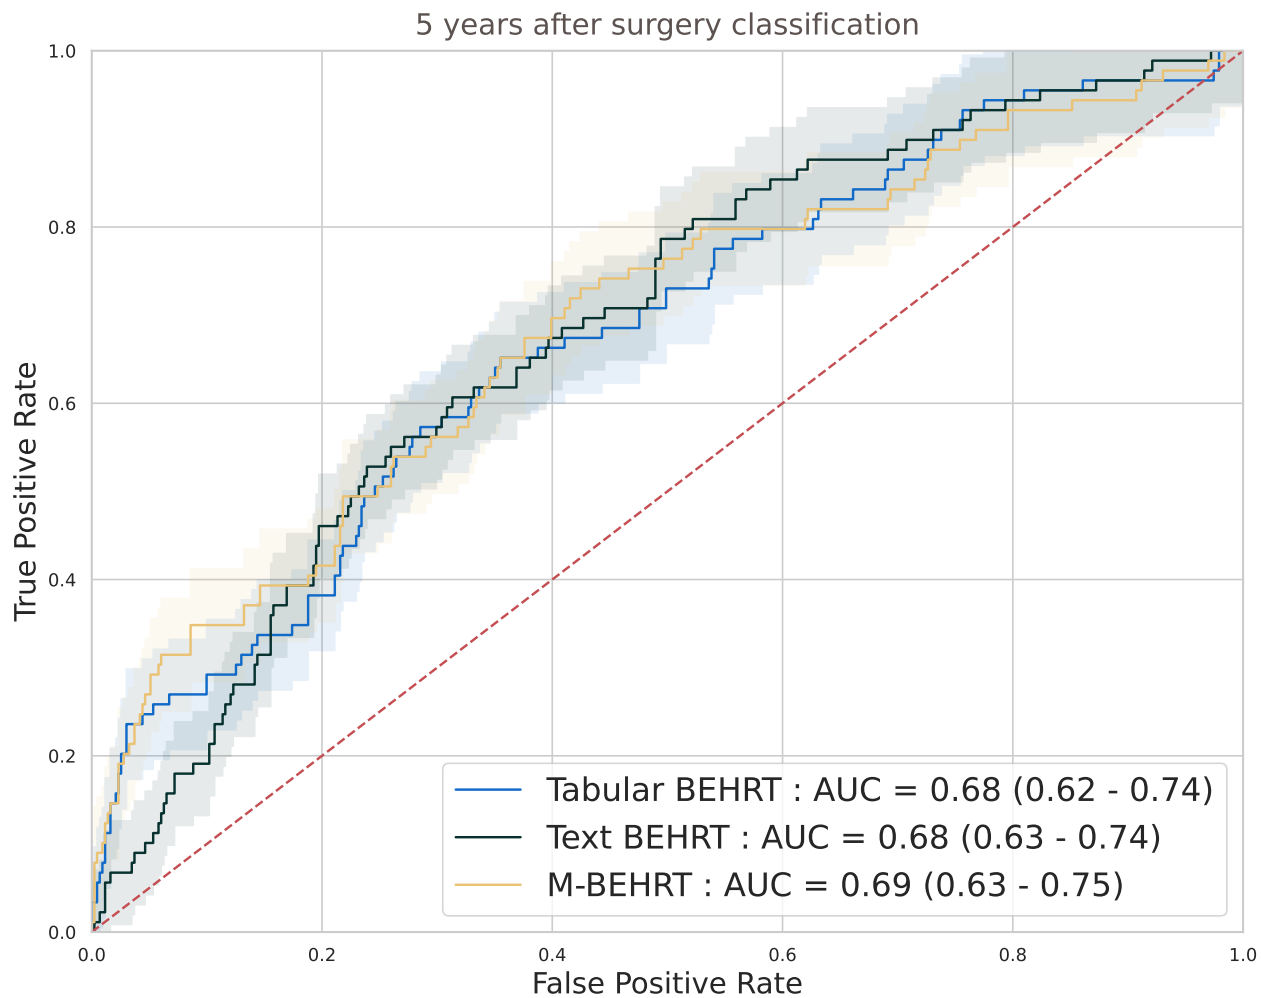

**Figure S14.** ROC curves comparing Tabular BEHRT and Text BEHRT against their combined model M-BEHRT, for the prediction of disease-free survival 5 years after surgery.

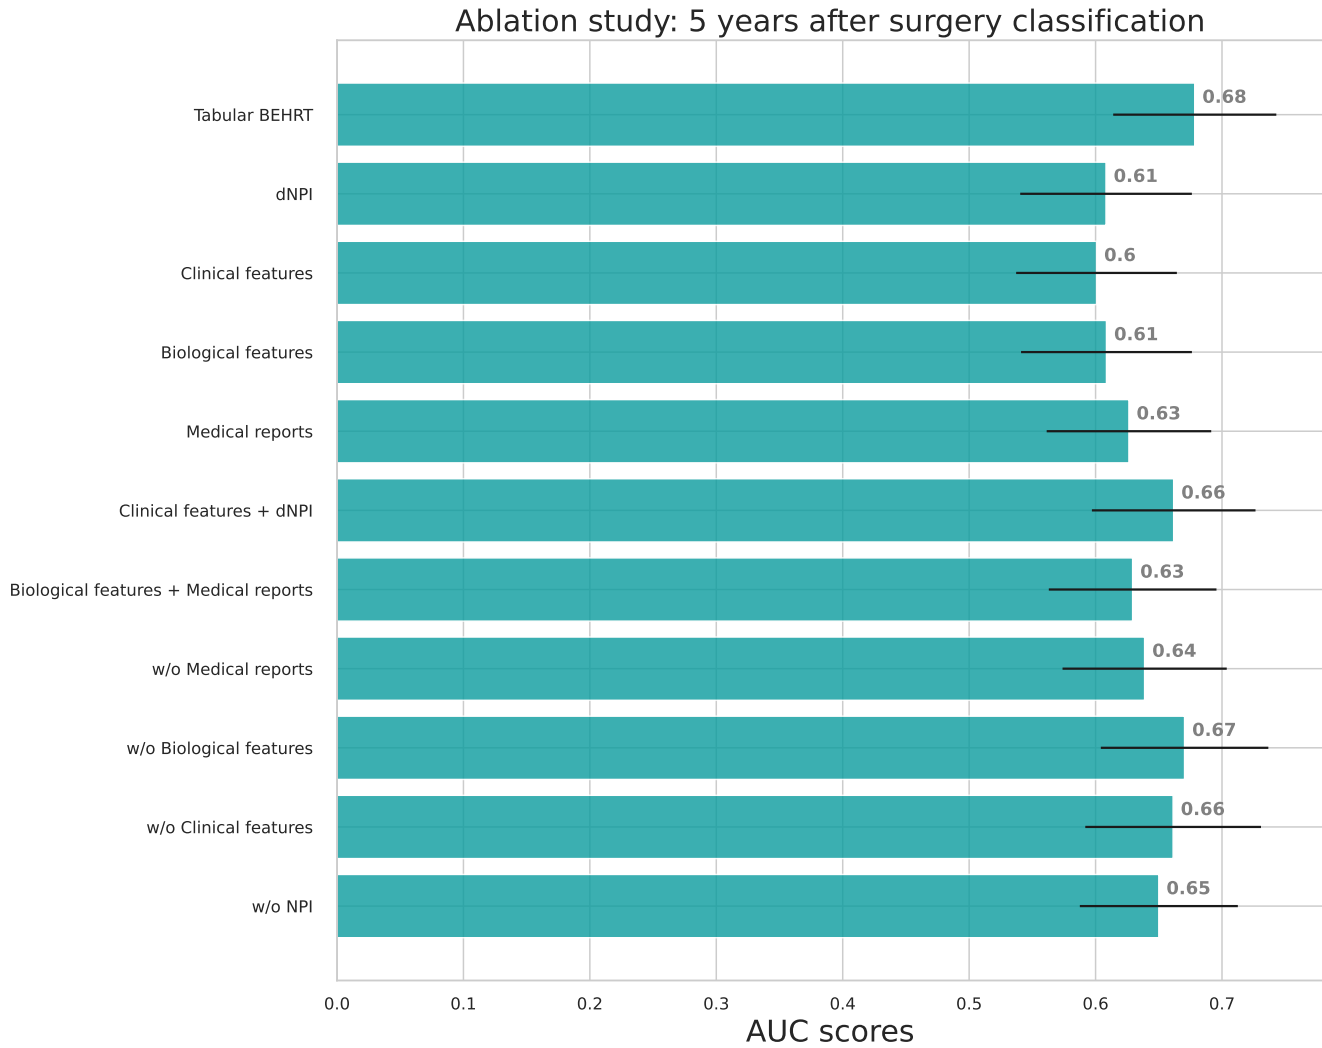

**Figure S15.** Ablation studies AUC-ROC on the test set for Tabular BEHRT, for the prediction of disease-free survival 5 years after surgery. We present results for the full model (Tabular BEHRT), then using only one of the 4 modalities (dNPI, clinical features, biological features, medical visits), two modalities (dNPI+clinical or biological+visits), then removing one of the 4 modalities. Here “medical records” stands for features extracted from the medical record headers, that is to say, visit department and procedure. Performance scores are presented on the test set.

Multimodal BEHRT Supplementary Material

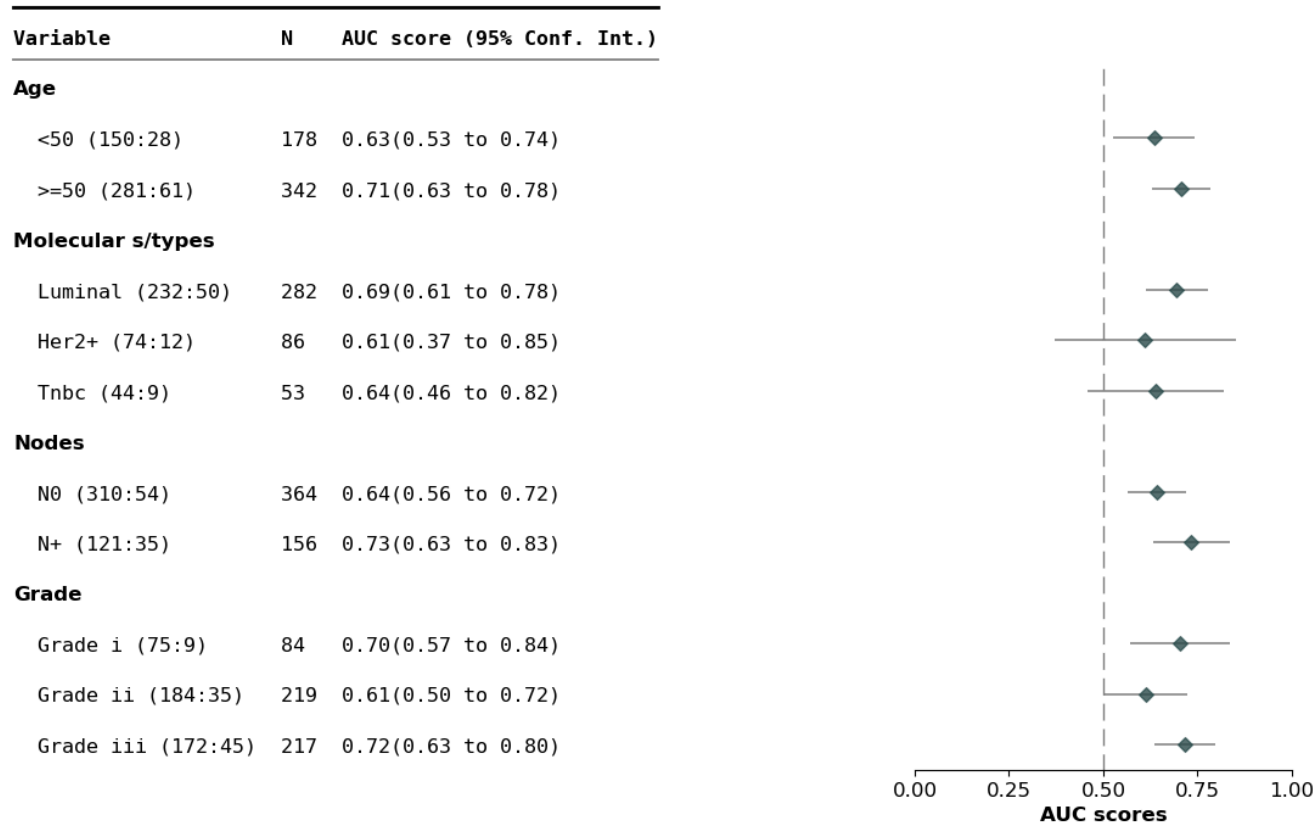

**Figure S16.** AUC-ROC of M-BEHRT stratified by patient age, cancer grade, molecular subtype and node status, for the prediction of disease-free survival 5 years after surgery.

| Variable                   | N   | AUC score (95% Conf. Int.) |
|----------------------------|-----|----------------------------|
| <b>VPPG</b>                |     |                            |
| DNPI >= 6.4 (10:7)         | 17  | 0.61(0.47 to 0.75)         |
| <b>PPG</b>                 |     |                            |
| 5.4 <= DNPI < 6.4 (31:11)  | 42  | 0.67(0.55 to 0.80)         |
| <b>MPGI</b>                |     |                            |
| 4.4 <= DNPI < 5.4 (121:21) | 142 | 0.62(0.48 to 0.76)         |
| <b>MPGII</b>               |     |                            |
| 3.4 <= DNPI < 4.4 (71:18)  | 89  | 0.70(0.57 to 0.83)         |
| <b>GPG</b>                 |     |                            |
| 2.4 <= DNPI < 3.4 (137:21) | 158 | 0.83(0.69 to 0.98)         |
| <b>EPG</b>                 |     |                            |
| DNPI <=2.4 (61:11)         | 72  | 0.69(0.41 to 0.96)         |

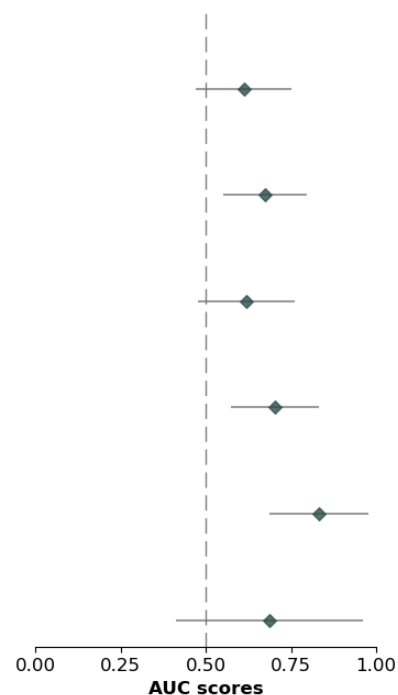

**Figure S17.** AUC-ROC of M-BEHRT stratified by NPI, for predicting disease-free survival 5 years after surgery.

Multimodal BEHRT Supplementary Material

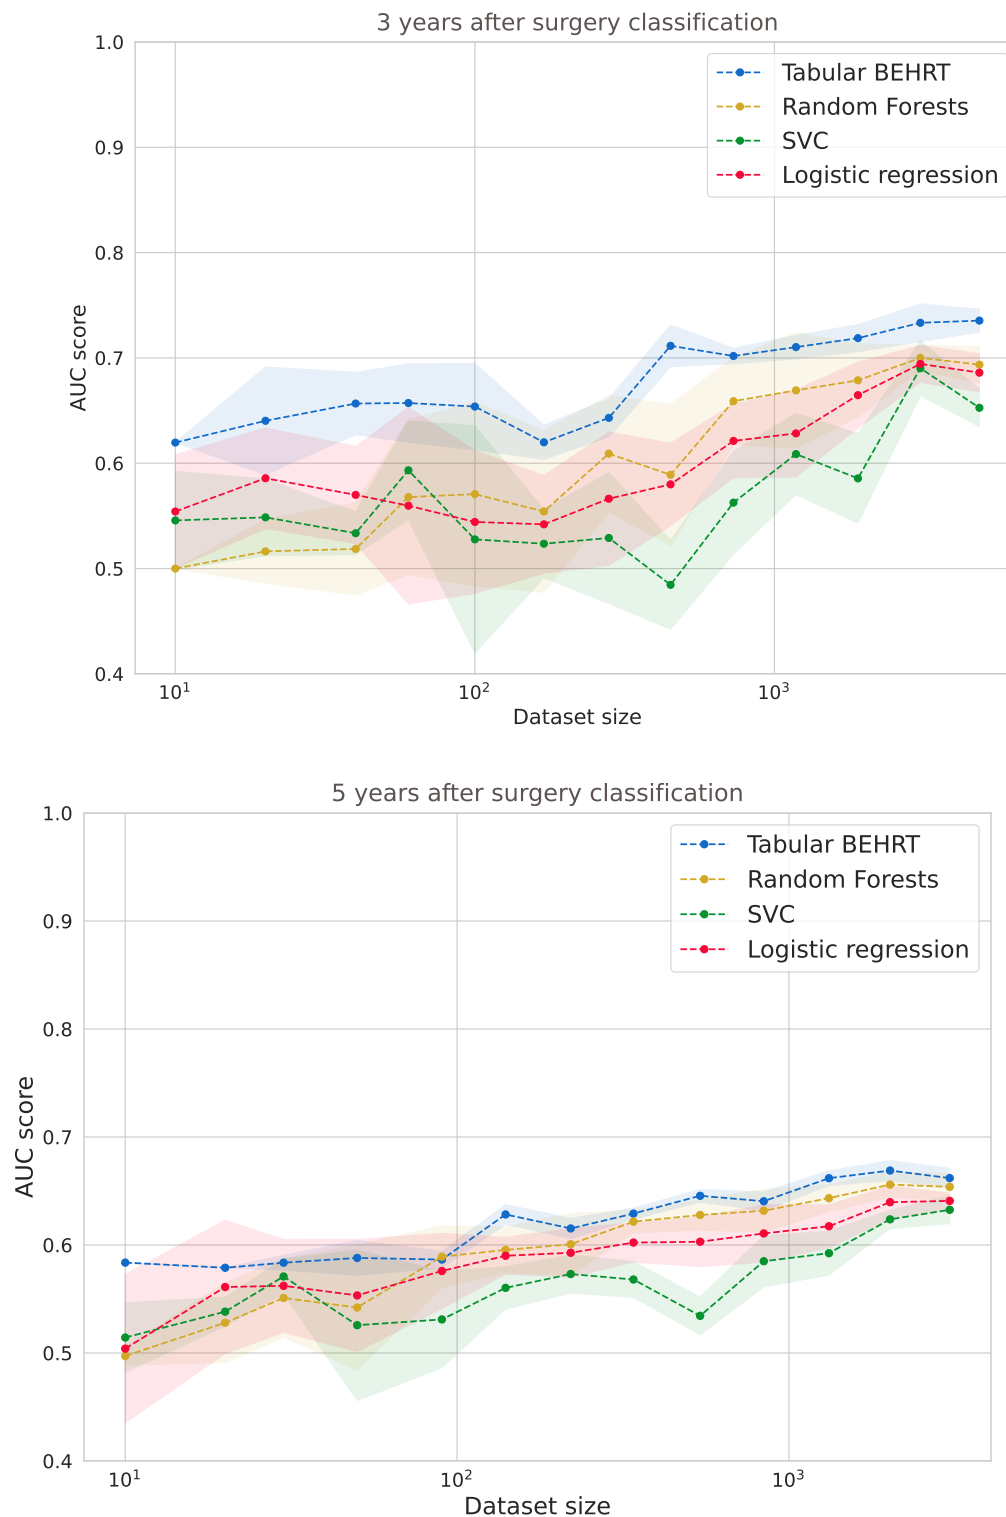

**Figure S18.** AUC-ROC on the test set of Tabular BEHRT, random forests, support vector classifier, and logistic regression trained on subsets of the training set of increasing sizes (x-axis), for the prediction of disease-free survival 3 (top) or 5 (bottom) years after surgery.

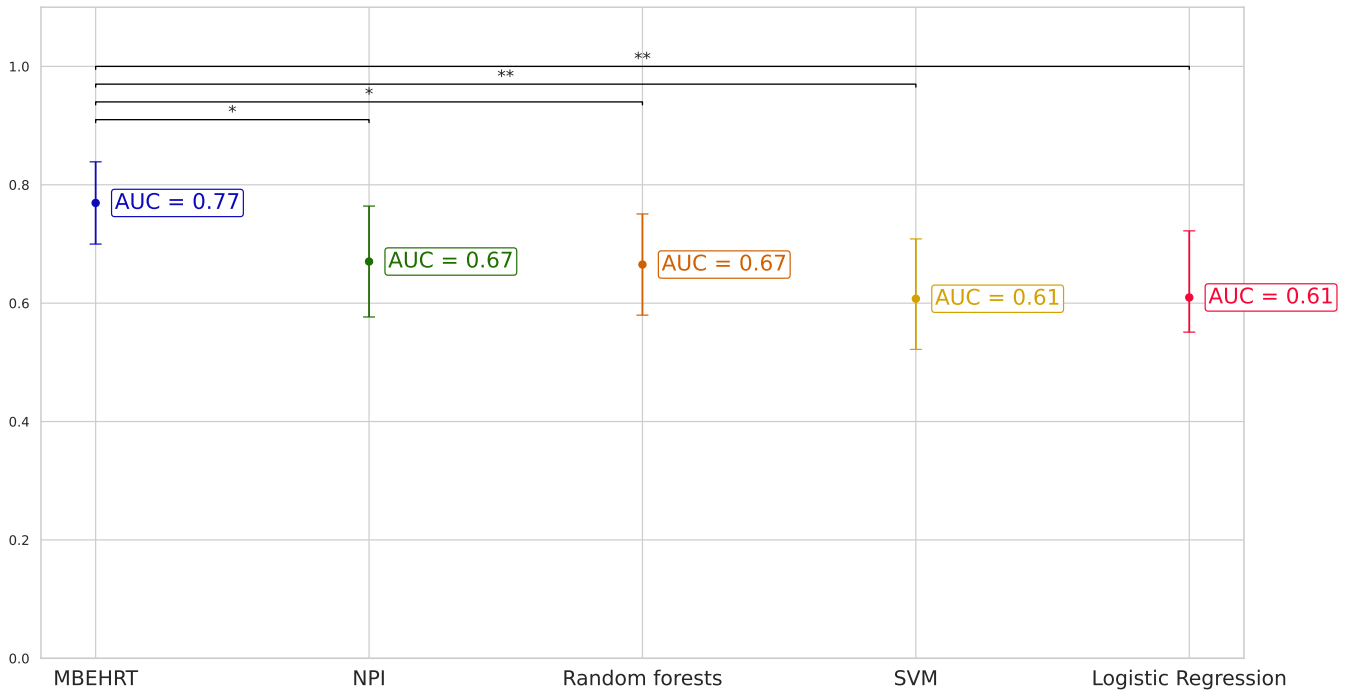

**Figure S19.** AUC scores comparison between M-BEHRT and the baselines for the prediction of disease-free survival 3 years after the surgery on the test set.



# ***Supplementary Text to Multimodal BEHRT: Transformers for Multimodal Electronical Health Records***

## **1 PREPROCESSING OF FREE TEXT**

Removing proper nouns is one of the key step of the preprocessing pipeline. This is important as specific doctor names may serve as proxy for the DFS classification, for example, when a doctor mostly handles severe cases. Patient names are already excluded from the reports, which had been anonymized before we accessed them. The first stage of this process consists in using part-of-speech tagging to remove proper nouns tags that follow titles such as *Dr, M.* (“Mr” in English), *Mme* (“Mrs” in English). However, proper nouns may appear without a title. We thus further constructed a list of proper nouns to remove from the text. We first built a list of names of Institut Curie’s health practitioners, obtained through the public directory of practitioners Cur (Accessed: 2023-01-30) as retrieved in 2023, and therefore only partially matching practitioners that were involved in the care of patients in the 2005–2012 period covered by our cohort). We additionally considered surnames given at least 30 times in France from 1891 to 2000 (n=218 912) and first names given at least 20 times from 1946 to 2022 in France (n=36 964), as provided by Institut National de La Statistique et des Etudes Economiques (INSEE) ( Ins (Accessed: 2023-01-30), INS (Accessed: 2023-01-30)). We then removed from this list the proper names that correspond to disease names, such as Paget.

One other main difficulty that occur with free-text reports is the high number of typos. To address this issue, we used the pypellchecker spell checking algorithm Barus (2023) which identifies, for each word of the corpus that is not found in a given dictionary, the most likely correct replacement for this presumably misspelled word. For effective spellchecking, it is crucial to have a rich dictionary that contains medical jargon. Therefore, we augmented the French vocabulary from OpenSubtitles Lison and Tiedemann (2016) (implemented by default in pypellchecker) with the contents of the French open dictionary Usito ush (Accessed: 2023-01-30), as well as the 3 184 words from a French online medical dictionary Thomsen (Accessed: 2023-01-30), the CAS corpus of French clinical cases Grabar et al. (2018) which contains over 397 000 word occurrences, a list of drug names in French vid (Accessed: 2023-01-30), and two lists of French medical abbreviations specific to oncology moz (2020); Poletto (2023). If, following this step, any words from the dictionary remain unidentified, we replaced them with the most likely correct spelling suggestion from Wikipedia wik (Accessed: 2023-01-30).

## **2 TEXT BEHRT INTERPRETATION**

We choose to analyze the most frequent sequences for the DFS negative cohort that are not found in the DFS positive cohort. We ended up with the following sequences of words, some of which have been obtained with the overlapping resulting sequences:

- “sein en involution adipeuse partielle avec contingent glandulaire inferieur a 50”, (*breast in partial adipose involution with less than 50% glandular contingent*)
- “Traitement anterieur par hormone de croissance extractible non facteurs de risque de transmission de la mcj”, (*Previous treatment with extractable growth hormone without risk factors for mcj transmission*)

- “[avec] lymphadenectomie axillaire”, (*with axillary lymphadenectomy*)
- “syndrome de masse”, (*mass syndrom*)
- “[j1] solumedrol 80mg”, (*solumedrol 80mg*)
- “lovenox 0 4 ml”, (*lovenox 0 4 ml*)

## REFERENCES

- Curie - annuaire 2023 (Accessed: 2023-01-30). <https://curie.fr/annuaire-medecins>.
- Insee noms (Accessed: 2023-01-30). <https://www.insee.fr/fr/statistiques/3536630>.
- Insee prenom (Accessed: 2023-01-30). <https://www.insee.fr/fr/statistiques/7633685?sommaire=7635552>.
- Barus T. pypellchecker – Pure python spell checker based on work by Peter Norvig (2023). <https://pypi.org/project/pypellchecker>.
- Lison P, Tiedemann J. OpenSubtitles2016: Extracting large parallel corpora from movie and TV subtitles. Calzolari N, Choukri K, Declerck T, Goggi S, Grobelnik M, Maegaard B, et al., editors, *Proceedings of the Tenth International Conference on Language Resources and Evaluation (LREC'16)* (Portorož, Slovenia: European Language Resources Association (ELRA)) (2016), 923–929.
- Usito, dictionnaire général de la langue française (Accessed: 2023-01-30). Université de Sherbrooke <https://usito.usherbrooke.ca/>.
- Thomsen C. Dictionnaire Médical (Accessed: 2023-01-30). <https://www.dictionnaire-medical.fr/>.
- Grabar N, Claveau V, Dalloux C. CAS: French corpus with clinical cases. Lavelli A, Minard AL, Rinaldi F, editors, *Proceedings of the Ninth International Workshop on Health Text Mining and Information Analysis* (Brussels, Belgium: Association for Computational Linguistics) (2018), 122–128. doi:10.18653/v1/W18-5614.
- Le Dictionnaire VIDAL (Accessed: 2023-01-30). <https://www.vidal.fr/medicaments.html>.
- Oncopod – abréviations pour l’oncologie (2020). <https://www.mozocare.com/fr/oncopod/chemotherapy/abbreviations/> (Accessed: 2023-01-30), Mozocare.
- Poletto B. Glossaire info cancer (2023). <https://www.arcagy.org/infocancer/cms/glossaire>, (Accessed: 2023-01-30).
- Wikipédia – l’encyclopédie libre (Accessed: 2023-01-30). <https://fr.wikipedia.org>.
